## **TASOR expression in naive embryonic stem cells safeguards their developmental potential**

Carlos A. Pinzon-Arteaga<sup>1,2,3,\*</sup>, Ryan O'Hara<sup>4,\*</sup>, Alice Mazzagati<sup>7</sup>, Emily Ballard<sup>1,2</sup>, Yingying Hu<sup>1,2</sup>,

Alex Pan<sup>1</sup>, Daniel A. Schmitz<sup>1,2</sup>, Yulei Wei<sup>1,7</sup>, Masahiro Sakurai<sup>1,2</sup>,

Peter Ly<sup>5,6</sup>, Laura Banaszynski<sup>2,4,8</sup>, Jun Wu<sup>1,2,8</sup>

<sup>1</sup> Department of Molecular Biology, University of Texas Southwestern Medical Center, Dallas, TX 75390.

<sup>2</sup> Hamon Center for Regenerative Science and Medicine, University of Texas Southwestern Medical Center, Dallas, TX 75390

<sup>3</sup> Howard Hughes Medical Institute, Department of Cell Biology, Blavatnik Institute, Harvard Medical School, Boston, MA, USA.

<sup>4</sup> Green Center for Reproductive Biology Sciences, Department of Obstetrics and Gynecology, Children's Research Institute, University of Texas Southwestern Medical Center, Dallas, Texas, United States

<sup>5</sup> Department of Pathology, University of Texas Southwestern Medical Center, Dallas, Texas, United States

<sup>6</sup> Department of Cell Biology, Harold C. Simmons Comprehensive Cancer Center, University of Texas Southwestern Medical Center, Dallas, Texas, United States

<sup>7</sup> State Key Laboratory of Animal Biotech Breeding, College of Biological Sciences, China Agricultural University, Beijing, 100193, China

\*These authors contributed equally

<sup>8</sup> Correspondence [laura.banaszynski@utsouthwestern.edu](mailto:laura.banaszynski@utsouthwestern.edu), [Jun2.Wu@utsouthwestern.edu](mailto:Jun2.Wu@utsouthwestern.edu)

1 **Abstract**

2

3 The seamless transition through stages of pluripotency relies on a delicate balance between transcription  
4 factor networks and epigenetic silencing mechanisms that ensure proper regulation of the developmental  
5 program, critical for normal development. Here, we uncover the pivotal role of the transgene activation  
6 suppressor (TASOR), a component of the human silencing hub (HUSH) complex, in sustaining cell viability  
7 during the transition from naive to primed pluripotency, despite its rapid downregulation during this  
8 transition. Loss of TASOR in naive cells triggers replication stress, disrupts H3K9me3 heterochromatin  
9 formation, and compromise the transcriptional and post-transcriptional silencing of LINE-1 (L1)  
10 transposable elements (TEs), with these effects become more pronounced in primed cells. Remarkably,  
11 the survival of *Tasor*-knockout cells during naive to primed transition can be restored through the inhibition  
12 of cysteine-aspartic acid protease (Caspase) or deletion of mitochondrial antiviral signaling protein  
13 (MAVS). This suggests that unscheduled L1 expression activates an innate immune response, leading to  
14 programmed cell death, specifically in cells exiting naïve pluripotency. Additionally, we propose that  
15 HUSH-promoted H3K9me3 in naïve PSCs sets the stage for ensuing DNA methylation in primed cells,  
16 establishing long-term silencing during differentiation. Our findings shed insights on the crucial impact of  
17 epigenetic programs established in early developmental stages on subsequent phases, underscoring their  
18 significance in the developmental process.

## 19 **Introduction**

20 The naïve epiblast in the preimplantation blastocyst exhibits a transient state of global DNA  
21 hypomethylation due to epigenetic reprogramming following fertilization. Mouse and human pluripotent  
22 stem cells (PSCs) cultured in the presence of the MEK 1/2 inhibitor PD0325901 exhibit low DNA  
23 methylation akin to the preimplantation epiblast representing the naïve state of pluripotency<sup>1-6</sup>. Exiting the  
24 naïve state can be triggered by removing MEK inhibition or via direct exposure to FGF2 and Activin A (FA),  
25 inducing mouse naïve PSCs to differentiate into transient formative epiblast-like cells (EpiLCs)<sup>7</sup>, which can  
26 be further stabilized in culture as primed epiblast stem cells (EpiSCs)<sup>8,9</sup>. EpiSCs resemble the post-  
27 implantation epiblast and are characterized by high levels of DNA methylation and an inactive X  
28 chromosome<sup>10</sup>.

29 The human genome is composed approximately 54% from repeat sequences that include more  
30 than 630 long interspaced nuclear elements (LINEs or L1s)<sup>11</sup>. In somatic cells, L1s are typically silenced  
31 through DNA 5mC CpG methylation<sup>11</sup>, yet in naïve PSCs, L1s are transcribed<sup>12</sup> as a consequence of the  
32 hypomethylated genome<sup>13</sup>. The dysregulation of L1s has been linked to age-related disorders<sup>11-15,14</sup> and  
33 carcinogenesis<sup>6,15</sup>. Therefore, elucidating the mechanisms that safeguard the hypomethylated genome of  
34 naïve PSCs against the activation of repetitive elements could significantly enhance our understanding of  
35 the etiology of L1-associated disorders and may uncover new therapeutic interventions.

36 TASOR is a component of the human silencing hub (HUSH) complex, which is composed of two  
37 additional members, M-phase phosphoprotein 8 (MPP8) and periphilin 1 (PPHLN1). The HUSH complex  
38 mediates gene silencing through H3K9me3 of repeats and intronless mobile elements<sup>16</sup>, particularly  
39 targeting the evolutionary young L1 endogenous TEs<sup>17-20</sup>. Despite previous studies, TASOR's function in  
40 early embryonic development is not fully understood. Here, we dissect TASOR's role in naïve pluripotency  
41 maintenance and exit through loss of function and epigenomic profiling studies.

42

## 43 **TASOR loss results in prograded cell death upon the exit of naïve pluripotency**

44 Many epigenetic features associated with the pre- and post-implantation epiblast, e.g. DNA  
45 methylation<sup>21</sup>, can be recapitulated by cultured PSCs (Figure S1A and S2A-S2B). To identify epigenetic  
46 regulators of epiblast development, we performed bioinformatic analyses using published datasets<sup>22</sup> and  
47 compared chromatin interacting proteins during the transition from naïve mouse embryonic stem cells  
48 (ESCs) to formative epiblast-like cells (EpiLCs). We found that the HUSH component *Tasor* is highly  
49 expressed in naïve ESCs but rapidly downregulated at both the mRNA and protein levels upon  
50 differentiation (Figure 1A). We confirmed that TASOR protein is indeed lost in mouse (Figure 1B) and  
51 human (Figure S2C) primed PSCs. This observation is particularly interesting given previous reports  
52 showing that a loss-of-function mutation in *Tasor* leads to an *in vivo* gastrulation defect resulting in  
53 embryonic lethality<sup>23,24</sup>.

54 To investigate the role of TASOR in pluripotency, we generated *Tasor Knockout (KO)* naïve mouse  
55 PSCs (here after referred to as ESCs) using CRISPR-CAS9<sup>25</sup> (Figures 1C and S1B-S1D). *Tasor*-KO ESCs  
56 maintained normal colony morphology and continued to express pluripotency markers when grown in the  
57 naïve (2i/LIF) condition (Figures S1E and S1F). We next tested how *Tasor* loss would affect the transition  
58 from naïve ESCs (2i/LIF) to formative PSCs conditions FAC (also known as FTW)<sup>26</sup>, and AloXR<sup>27</sup>.  
59 Surprisingly, although *Tasor* is drastically downregulated upon exit of the naïve state, we found that  
60 TASOR is required to establish formative PSCs, as only a few colonies are observed during the conversion  
61 in the absence of TASOR (Figures S1G and S1H). ESCs can transition to transient formative EpiLCs<sup>7</sup> via  
62 exposure to FGF2 and Activin A (FA), and EpiLCs can be stabilized in culture as EpiSCs<sup>26</sup> under FGF and  
63 WNT inhibition (NBFR). EpiSCs closely resemble the ectoderm of the late-gastrula-stage embryo<sup>28,29</sup>.  
64 Interestingly, we found that *Tasor* KO ESCs could transition to EpiLCs but failed to form colonies in the  
65 NBFR medium (Figure 1D). Notably, cellular differentiation phenotypes were rescued upon reintroduction  
66 of TASOR cDNA (TASOR putback, PB) in all conditions (Figures 1D, S1G and S1H). These findings suggest  
67 TASOR's critical function in preserving cell viability after the transition from naïve pluripotency.  
68 Furthermore, they suggest that the gastrulation defect observed in *Tasor* mutant embryos *in vivo* could be  
69 partially due to the reduced survival of formative/primed epiblast cells.

70 We hypothesized that, in the absence of TASOR, the compromised *in vivo* differentiation potential  
71 might be due to an inability to properly establish differentiation-specific transcription programs. However,  
72 RNA sequencing (RNA-seq) revealed that, despite some transcriptional changes, *Tasor* loss was mostly  
73 compatible with differentiation to EpiLCs (Figure 1E), evidenced by the upregulation of *FGF5* and  
74 downregulation of *Nanog* expression (Figure S3A). Transcriptional changes were verified via qPCR for the  
75 upregulation of formative/primed marker genes *Otx2* and *Fgf5*, and the downregulation of *Prdm14* and  
76 *Tasor* (Figures. S3B-S3E). To assess the differentiation potential of *Tasor*-KO ESCs further, we performed  
77 teratoma analysis. Despite being smaller than those from WT controls, teratomas derived from *Tasor*-null  
78 ESCs contained tissues from all three germ layers (Figures S1I-S1K). Overall, these results indicate that  
79 despite compromised viability early in differentiation, ESCs lacking TASOR are still capable of  
80 differentiating into cells from all three primary germ layers.

81 Previously studies have demonstrated that p53 deficiency can partially mitigate the gastrulation  
82 defect observed in *Tasor* mutant embryos. This rescue effect is attributed to the reduction of apoptosis  
83 mediated by cysteine-dependent aspartate-specific proteases (CASPASE)<sup>24,30</sup>. To determine whether the  
84 diminished colony-forming capacity of *Tasor*-KO ESCs upon transitioning to formative and primed states  
85 was due to cell death, we used SYTOX green staining to quantify dead and dying cells following formative  
86 (AloXR) transition. In contrast to WT cells, *Tasor*-KO resulted in extensive cell death during the transition  
87 (Figure 1F). Cell death can occur through several mechanisms, including apoptosis, pyroptosis, and  
88 necroptosis<sup>30</sup>, or through a combination of these pathways known as PANoptosis<sup>31</sup>. With the main shared  
89 mechanism for some of these pathways being by the cleavage of cysteine-dependent aspartate-specific

90 proteases (CASPASE). To determine the mode of cell death in *Tasor*-KO cells, we applied the pan-  
91 CASPASE inhibitor Emricasan and found that 5  $\mu$ M Emricasan significantly restored the colony-forming  
92 capability and greatly enhanced cell survival following formative transition (Figure 1F). This evidence, along  
93 with findings from prior studies, suggests apoptosis as the primary mechanism of cell death, though the  
94 potential contribution of pyroptosis or PANoptosis has not been conclusively excluded. These findings  
95 collectively indicate that TASOR is crucial for the transition from naïve to formative state, with the loss of  
96 *Tasor* in ESCs leading to marked increase in programmed cell death among formative cells.

97

### 98 **TASOR loss leads to increased DNA damage and cell cycle arrest**

99 Previous studies have demonstrated that disrupting the HUSH complex leads to DNA damage  
100 and cell cycle arrest<sup>32,33</sup>. Consistently, the loss of TASOR resulted in a longer doubling time, which was  
101 reversed upon TASOR reintroduction (Figure S4A). Cell cycle analysis via EdU incorporation revealed that  
102 the increased doubling time is due to both an elongated G2/M phase and a shortened S phase (Figures  
103 2A and S4B). Additionally, there was a decrease in the number of cells positive for the mitotic marker  
104 phospho (Ser 10) H3 (Figures 2B, S4C and S4D), indicating that the accumulation cells in G2/M phase is  
105 likely caused by a G2 arrest. We investigated whether DNA damage might contribute to the observed G2  
106 arrest. Our findings revealed that the absence of *Tasor* is associated with elevated levels of phospho(S139)  
107 gamma H2AX ( $\gamma$ -H2AX) (Figure 2C), along with increased phospho p53, and phospho DNA-PKcs (s2056)  
108 (Figure S4E). Additionally, RNA-seq indicated an increase in the expression of retinoblastoma (*Rb1*) in  
109 *Tasor* KO ESCs (Figure S4F). Notably, both *Rb1* expression levels was further upregulated upon transition  
110 to EpiLCs with the addition of the cyclin-dependent kinase inhibitor 1A (*Cdkn1a*, also known as p21)  
111 (Figure S4G), suggesting that enhanced activation of p53-p21-Rb pathway<sup>34</sup> might be driving the G2 cell  
112 cycle arrest.

113 To elucidate the immediate impact of TASOR loss on DNA damage, we engineered an ESC line  
114 containing *Oryza sativa* TIR1 (OsTIR1) F74G and a *Tasor* re-expression vector with a C-terminal mini auxin-  
115 inducible degron (mAID)<sup>35,36</sup>. Treatment with 2  $\mu$ M 5-phenyl-indole-3-acetic acid (5-Ph-IAA) rapidly  
116 degraded TASOR (Figures 2D and S4H), resulting in a marked decrease in the nuclear signal of TASOR-  
117 flag (Figures 2E and 2), H3K9me3 (Figure S4J), phospho-H3 (Figure S4L), and MPP8 (Figure S4M), while  
118 leaving H3K27me3 levels unchanged (Figure S4N). These observations suggest that the acute loss of  
119 *Tasor* mirrors the effects of its chronic absence. Using this system, we confirmed a significant increase in  
120  $\gamma$ -H2AX foci 24 hours post-TASOR depletion (Figures 2E and 2G). Further analysis through co-staining for  
121 FLAG-tagged TASOR, H3K9me3 and  $\gamma$ -H2AX, revealed TASOR appeared as nuclear punctuate and co-  
122 localized with some H3K9me3 and  $\gamma$ -H2AX foci (Figures 2E, S4I-S4J). Given that H3K9me3 accumulates  
123 at stalled replication forks and DNA double-strand breaks<sup>37,38</sup>, and its loss can compromise replication fork  
124 stability<sup>39</sup> and double stranded break repair<sup>38</sup>, we determined whether the increased  $\gamma$ -H2AX signaled  
125 replication fork instability. By labeling replication tracts with 5-chloro-2'-deoxyuridine (CldU) and 5-iodo-

126 2'-deoxyuridine (IdU) and analyzing DNA fibers (Figure 2H), we found that TASOR depletion reduced both  
127 replication fork length and speed, without affecting fork symmetry (Figures 2I-2K), pointing to replication  
128 fork stress in the absence of TASOR.

129

### 130 **Interplay between TASOR and DNA methylation in naïve ESCs**

131 To study the link between DNA methylation and TASOR's role in H3K9me3 regulation, we adjusted  
132 the global DNA methylation levels in ESCs. MEK inhibition leads to a dose-dependent decrease in DNA  
133 5mC methylation in ESCs, a process attributed to the loss of UHRF1 and the reduced expression of the  
134 *de novo* methyltransferases Dnmt3a, Dnmt3b and Dnmt3l<sup>40,41</sup>. This reduction is facilitated by the  
135 transcription factor PRDM14<sup>42</sup>. Consequently, lowering the MEK inhibitor PD0325901 concentration from  
136 1  $\mu$ M to 0.2  $\mu$ M in titrated 2i/L (t2i/L) increases global DNA methylation levels without altering the  
137 pluripotency state<sup>43</sup>. Conversely, the addition of L-ascorbic acid (a form of Vitamin C) promotes DNA  
138 hypomethylation, as vitamin C acts as a cofactor for Fe(II)/2-ketoglutarate-dependent (Fe/ $\alpha$ KG)  
139 dioxygenases by reducing Fe<sup>3+</sup> to Fe<sup>2+</sup><sup>44,45</sup>. Fe/ $\alpha$ KG dioxygenases include various epigenetic regulators  
140 like Jumonji C domain-containing histone demethylases (JHDMs, e.g., KDM4A/C), DNA and RNA  
141 demethylases (ALKBH family), and the TET family of DNA hydroxylases<sup>44,46,47</sup>. Thus, adding L-ascorbic  
142 acid can lead to reductions in DNA 5mC<sup>48-50</sup>, H3K9me3<sup>51</sup>, and m6A RNA levels<sup>52,53</sup> (Figures S1A, S5A and  
143 S5B).

144 Compared to controls (WT, PB and OE ESCs), we found *Tasor*-KO ESCs were more vulnerable to  
145 global hypomethylation induced by vitamin C, resulting in a more pronounced increase in doubling time  
146 and cell cycle arrest (Figures S5C and S5D). The addition of 100  $\mu$ g/ml of vitamin C<sup>4,50</sup> further exacerbated  
147 the derepression of L1 ORF1 protein levels (Figure S5B) and led to an increase in segregation errors and  
148 chromosomal abnormalities (Figures S5F-S5L). Interestingly, when cultured in t2i/L, both WT and *Tasor*-  
149 KO ESCs showed an increase in global H3K9me3 levels (Figure S5B) and a decrease in doubling time  
150 compared to those cultured in standard 2i/L condition (Figures S5C and S5E). These findings suggest  
151 partial rescue of *Tasor*-KO ESCs phenotypes when cultured with reduced MEK inhibition<sup>54</sup>. A similar  
152 compensatory response was noted in *Mpp8*-KO ESCs grown in the serum/LIF condition<sup>54</sup>, which might  
153 be facilitated by a polycomb-mediated epigenetic switch involving H3K27me3<sup>50</sup>.

154 To determine the sequence of events involving DNA methylation and TASOR-mediated H3K9me3,  
155 we compared *Tasor*-KO ESCs with triple *Dnmt* knockout (*Dnmt*-3xKO) ESCs, which lack *Dnmt1*, *Dnmt3a*,  
156 and *Dnmt3b*. Immunostaining revealed that *Dnmt*-3xKO ESCs exhibited a loss of DNA methylation marks  
157 5mC and 5hmC (Figures S6A and S6B), yet retained histone modifications H3K9me3 and H3K27me3  
158 (Figures S6C and S6D). Notably, *Dnmt*-3xKO ESCs mostly did not phenocopy *Tasor* loss, including the  
159 prolonged doubling time and decreased number of cells positive for the phospho (Ser 10) H3 (Figures S6E  
160 and S6F). Additionally, upon culturing in AloXR for 48h, we did not observe substantial cell death (Figure  
161 4C), consistent with a previous report<sup>55</sup>. However, *Dnmt*-3xKO ESCs exhibited a similar increase in L1

162 transcripts as observed in *Tasor*-KO ESCs (Figure 4B). These results suggest that in naïve ESCs, both  
163 TASOR-mediated H3K9me3 and DNA methylation are critical for L1 repression. This is in contrast to what  
164 is observed in somatic cells where DNA methylation plays a more essential role, which is evidenced by  
165 the observation that upon TASOR loss, L1 elements remain repressed through strong promoter  
166 methylation<sup>56,57</sup>.

167

### 168 **TASOR regulates steady-state LINE1 RNA transcripts**

169 HUSH complex is well known for its role in L1 retrotransposon silencing<sup>58</sup>. To investigate whether  
170 loss of retrotransposon silencing contributes to cell death in *Tasor*-KO ESCs during the transition to the  
171 formative state, we first mined our RNA-seq data. Our analysis revealed that TASOR loss led to a significant  
172 increase in the steady-state levels of L1 RNA in ESCs, particularly within the evolutionarily young L1MdTf  
173 family of LINEs (Figure 3A). Upon transition to EpiLCs, the absence of TASOR resulted in an even more  
174 pronounced surge in LINE transcript abundance (Figure 3B), which was further confirmed by  
175 immunostaining (Figure S1O). During the formative transition, the L1MdTf subfamily was the most affected,  
176 with notable dysregulation also observed in the L1MdA and L1MdG subfamilies (Figures 3B and 3C).  
177 Beyond LINEs, modest yet significant increases in transcript abundance were observed for two  
178 endogenous retrovirus (ERV2) subfamilies, MMETn and ETnERV, as well as for several satellite repeat  
179 subfamilies, including general satellites (GSAT\_MM), centromeric satellite (CENSAT\_MM), and minor  
180 satellite repeats (SYNREP\_MM). These satellite families exhibited substantial fold changes to WT, albeit  
181 at relatively low transcript levels (Figures S7A and S7F-S7I). Given the most striking changes in transcript  
182 abundance observed in *Tasor*-KO EpiLCs for LINEs, our further analyses focused on these elements.

183 The HUSH complex has previously been associated with the silencing of LINE elements through  
184 the deposition of H3K9me3<sup>17,18,59</sup>. To investigate the impact of TASOR loss on H3K9me3 levels at LINE  
185 elements, we performed Cleavage Under Targets and Tagmentation (CUT&Tag)<sup>60</sup> for Flag (TASOR) and  
186 H3K9me3. Our analysis revealed that TASOR predominantly binds to the 5' regulatory region of L1MdTf  
187 elements, with lesser binding observed across various other L1 subfamilies (Figures 3D and S7B). In  
188 comparison, H3K9me3 was highly enriched across a broad spectrum of repetitive elements, including  
189 LINEs, ERVs, telomeric and satellite repeats (Figures 7F and 7H), with H3K9me3 peaks at LINE elements  
190 frequently located near the 5' end (Figure S7C). Following *Tasor* KO, a notable reduction in H3K9me3 was  
191 observed in both ESCs and EpiLCs, especially at L1MdTf subfamilies (Figures 3D and S7C). This decrease  
192 in H3K9me3 at L1MdTf elements was reversed upon reintroduction of *Tasor* cDNA (Figure S7C).  
193 Furthermore, immunostaining, flow cytometry and immunoblot analyses also revealed a partial reduction  
194 in H3K9me3 levels in both mouse and human *TASOR*<sup>-/-</sup> ESCs (Figures S1L-S1N, and S2I-S2J). These  
195 results demonstrate TASOR's critical role in establishing and/or maintaining H3K9me3 at the 5' end of  
196 specific LINE subfamilies, and highlight that the loss of TASOR and subsequent reduction of H3K9me3  
197 are linked to increased LINE RNA abundance.

198 Since H3K9me3 is closely linked to gene silencing and predominantly found in heterochromatin,  
199 we explored whether the loss of H3K9me3 at L1MdTf elements would result in increased chromatin  
200 accessibility. To this end, we performed an assay for transposase-accessible chromatin followed by  
201 sequencing (ATAC-seq)<sup>61</sup>. Contrary to the significant reduction of H3K9me3 at L1MdTf elements following  
202 *Tasor* KO, the increase in ATAC signal in *Tasor*-KO ESCs and EpiLCs was only modest (Figure S7E).  
203 Interestingly, the transition of WT cells from ESCs to EpiLCs resulted in both a higher ATAC signal and a  
204 decrease in H3K9me3 at L1MdTf, without altering L1 RNA levels (Figures 3D and S7C-S7E). This  
205 observation suggests that during this transition, alternative silencing mechanisms, such as DNA  
206 methylation might come into play.

207 Motif analysis of ATAC peaks revealed that upon transition to EpiLCs, WT ESCs showed reduced  
208 accessibility at motifs associated with pluripotency transcription factors (SOX2, POU5F1) and increased  
209 accessibility at motifs associated with DNA methylation and imprinting (ZFP57), and higher-order  
210 chromatin organization (CTCF) (Figure S8A). In contrast, *Tasor*-KO ESCs exhibited reduced accessibility  
211 at ZFP57 binding sites relative to WT cells (Figure S8B). Furthermore, during the transition, *Tasor*-KO cells  
212 failed to decommision transcription factors from the KLF and POU families, including POU5F1 (also  
213 known as OCT4) (Figure S8C). These results suggest that although *Tasor*-KO ESCs could differentiate to  
214 EpiLCs, some transcriptional differences can be due to the inability to properly decommision ESC-  
215 specific transcription networks (Figure 1E).

216 Interestingly, we noted the transcriptional dysregulation of various imprinted genes (Figure S8D),  
217 including notable changes in *Igf2* (Figures S8E-F), and observed that certain genes containing internal L1s  
218 were derepressed in a manner dependent on the orientation of the L1 sequence (Figure S8G). Specifically,  
219 genes such as *Mrc1* and *Fsd11* exhibited derepression only in exons downstream of the L1 elements  
220 (Figures S8H and S8I). Additionally, during the transition of *Tasor*-KO ESCs to EpiLCs, there was an  
221 upregulation in the expression of gene exons adjacent to L1 sequences (Figure S8J). This observation can  
222 potentially be explained by recent reports of L1s acting as “gene traps” during splicing events, leading to  
223 the creation of chimeric transcripts<sup>62,63</sup>, or due to the disruption of H3K9me3 “spreading” mediated by the  
224 HUSH complex and MORC2 at these loci<sup>64,65</sup>.

225 Beyond its involvement in H3K9me3 deposition, the HUSH complex has also been implicated in  
226 the targeted degradation of L1 RNA via interactions with the nucellar exosome targeting (NEXT) and CCR4-  
227 NOT complexes<sup>16,66-68</sup>. To study the effect of TASOR loss on L1 RNA stability, we utilized the auxin-  
228 inducible TASOR-mAID line. Treatment with auxin led to a rapid increase in L1 transcripts, coinciding with  
229 the depletion of TASOR protein (Figures 3E, and 2D-2F). Using actinomycin D to halt further transcription,  
230 we tracked the persistence of selected RNAs over 8 hours in the presence or absence of TASOR (Figure  
231 3F). In control cells, the half-life of transcripts not typically targeted by be HUSH complex, such as TBP,  
232 remained unchanged (Figure 3G). Strikingly, auxin-induced TASOR depletion significantly increased the  
233 half-life of L1 RNA ( $t_{1/2} = 8.2\text{h} \pm 1.5$ ) compared to the DMSO-treated control ( $t_{1/2} = 4.6\text{h} \pm 2.1$ ) (Figure 3H),



234 indicating that the observed increases in L1 RNA following TASOR loss may be partly attributed to  
235 decreased degradation of L1 transcripts.

236

### 237 **Cell death upon *Tasor*-KO ESC-to-EpiLC transition is mediated by innate immunity.**

238 The HUSH complex plays a pivotal role in linking retrotransposon silencing with innate immunity,  
239 primarily through its control of L1 expression and the subsequent MAVS-dependent sensing of L1 RNA<sup>1869</sup>.  
240 In the context of cancer, disruptions to the HUSH complex leading to L1 dysregulation have been shown  
241 to trigger innate immune pathways, resulting in the death of cancer cells<sup>19,69</sup>. We speculated whether the  
242 cell death observed during the transition from *Tasor*-KO ESCs to EpiLCs could be due to an innate immune  
243 response. To test this, we first generated *Mavs* and *Tasor* double KO ESCs (Figure 4A), which exhibited  
244 somewhat reduced IRF3 dimer formation compared to *Tasor* KO (Figure S9A). Surprisingly, viability  
245 assessments after 48 hours in the AloXR condition revealed that the loss of MAVS nearly completely  
246 rescued the cell death seen in *Tasor*-KO EpiLCs (Figure 4C). Flow cytometry analysis confirmed that *Mavs*  
247 and *Tasor* double KO decreased the percentage of dead cells to levels similar to WT (Figures 4C and 4D).  
248 However, when cells were further transitioned from formative EpiLCs to primed EpiSCs, we observed  
249 diminished colony formation and alkaline phosphatase (AP) staining when compared to WT or PB cells,  
250 though the outcomes were still an improvement over *Tasor* KO (Figure S9B). Surprisingly, *Mavs* and *Tasor*  
251 double KO ESCs demonstrated a significantly reduced capacity to form teratomas compared to *Tasor* KO  
252 alone (Figures S9C-S9D), suggesting that while *Mavs* KO mitigates cell death immediately following exit  
253 from naive pluripotency, its simultaneous loss with TASOR introduces a synthetic lethality in later  
254 developmental stages. Unexpectedly, two separate *Mavs* and *Tasor* double KO clonal lines both showed  
255 markedly increased levels of L1 RNA when compared to *Tasor* KO alone (Figure 4B). Considering L1 RNA's  
256 role in activating MAVS-mediated innate immune pathway<sup>19,69</sup>, this increase might stem from a  
257 subpopulation of cells that highly express L1, which would typically undergo apoptosis in *Tasor* KO but  
258 survive in *Mavs* and *Tasor* double KO lines. Taken together, these results show that while cell death at the  
259 formative EpiLC stage is MAVS-dependent, other mechanisms likely contribute to later developmental  
260 stages.

261

### 262 **Discussion**

263 Our results demonstrate that TASOR/HUSH plays an important role in establishing H3K9me3-  
264 mediated heterochromatic silencing at L1 sequences and repeats in naïve PSCs. One possible mechanism  
265 to achieve this is by recognizing the nascent RNA transcript and targeting them for degradation similar to  
266 the yeast homolog of HUSH<sup>20</sup>, the RNA-induced transcriptional silencing (RITS) complex<sup>70-72</sup>. By ensuring  
267 no productive transcripts are produced may explain the observed phenomenon in naïve PSCs, where

268 transcription of L1s contributes to chromatin accessibility<sup>12</sup> and enhancer formation<sup>73</sup>, yet  
269 retrotransposition of L1s remains low.

270 H3K9me3 is essential for initiating DNA CpG methylation and maintaining low levels of histone  
271 acetylation, both key features of heterochromatin<sup>74-76</sup>. Our results suggests that the deposition of  
272 H3K9me3 in the preimplantation epiblast is crucial for setting the stage for DNA methylation post-  
273 implantation<sup>74,75</sup>, with these methylation patterns being preserved throughout development to ensure the  
274 long-term repression of repetitive elements and stabilization of cell fates<sup>77</sup>. It is likely that multiple  
275 mechanisms coordinate this H3K9me3–5mC crosstalk. In a simplified read-and-write model, UHRF1<sup>78</sup>  
276 reads H3K9me3 signals to guide DNMT1, thereby facilitating DNA methylation at H3K9me3 sites. DNMT1  
277 can also directly interact with H3K9me3 through its tandem tudor domain (TTD)<sup>78,79</sup>, while the MPP8  
278 chromodomain links the histone methyltransferases GLP/G9a with methylated DNMT3A, facilitating their  
279 interaction<sup>80</sup>. Additionally, protein-protein interactions between G9a-GLP and Dnmt3a further support this  
280 regulatory network<sup>74</sup>.

281 Our findings demonstrate that TASOR loss affects L1 mRNA stability and show that acute TASOR  
282 depletion triggers replication stress. Hush is known to interact with the co-transcriptional termination  
283 machinery<sup>68</sup>, the RNA deadenylase CCR4-CNOTcomplex scaffold protein CNOT1<sup>66</sup>, and components of  
284 the nuclear exosome targeting (NEXT) complex<sup>81</sup>. Increased L1 mRNA stability has been observed  
285 following the KO of the m6A demethylase FTO<sup>82</sup>, and HUSH is known to interact with the m6A reader  
286 YTHDF2<sup>66,67</sup>. While some researchers advocate for Mettl3<sup>83</sup> as the m6A writer involved in this process,  
287 others argue that Mettl3 does not specifically target L1s for degradation<sup>84</sup>.

288 A recent paper shows that in serum/LIF-cultured ESCs, the HUSH complex interacts with the  
289 leading strand DNA polymerase  $\epsilon$  (POLE) complex, specifically the POLE1/2 subunits. This interaction  
290 promotes the asymmetric transfer of H3K9me3 to the leading strand of the replication fork, and this  
291 H3K9me3 asymmetry silences “head on” orientation L1 expression in the S phase of the cell cycle<sup>33</sup>. The  
292 loss of POLE1/2 or TASOR can lead to increased DNA damage, as indicated by  $\gamma$ H2AX<sup>33</sup>, suggesting this  
293 interaction is crucial for preventing replication stress and DNA damage. Additionally, genome wide  
294 profiling of R-loop in ESCs<sup>85</sup> shows R-loops can accumulate at L1 5' promoters (Figure S8G). This R-loop  
295 accumulation at L1 promoters during DNA replication may be a causal determinant of DNA damage, as it  
296 could cause collisions with the replication forks<sup>86-88</sup>. Interestingly, the RNA–DNA helicase *DHX9* plays a  
297 protective role by unwinding of R-loops and G-quadruplexes<sup>89</sup>, and its loss results in defective H3K9me3  
298 heterochromatin inheritance<sup>90</sup>.

299 The observed increase in chromosome segregation errors, micronuclei, and abnormal karyotype  
300 (Figure S5) indicates that TASOR loss may lead to genomic instability through mechanisms beyond  
301 replication stress. The presence of TASOR at major satellite and centromeric repeats, together with the  
302 reduction of H3K9me3 following TASOR depletion and the concurrent gain of major satellite repeat RNA,  
303 as evidenced by RNA-seq and qPCR analyses, points to a potential effect on centromere integrity. This

304 notion is supported by studies involving epigenetic remodeling through a TALE-demethylase targeted to  
305 centromeric repeats<sup>91</sup>, which have shown a reduction in H3Kme3 levels, impaired HP1 recruitment, and  
306 subsequent impacts on chromosome segregation during mitosis.

307 ESCs are immunologically different from somatic cells<sup>92</sup>. Unlike differentiated cells, ESCs exhibit  
308 a much weaker response to cytoplasmic double-stranded RNA (dsRNA) and produce minimal amounts of  
309 IFN- $\beta$ <sup>93</sup>. This reduced innate immune response might serve as a protective mechanism, allowing ESCs to  
310 avoid immune-related cytotoxicity<sup>92</sup>. Our results suggest that the inability to silence ERVs and repetitive  
311 elements activates an “innate immune checkpoint”, leading to the elimination of cells that cannot suppress  
312 these elements during naïve-to-primed transition. This hypothesis is supported by findings that depletion  
313 of *Tasor*<sup>23</sup>, *YTHDC1*<sup>94</sup>, *SETDB1*<sup>95-97</sup>, *G9a/GLP*<sup>98,99</sup>, *SUV39H1/2*<sup>99-101</sup>, *Mettl3*<sup>94</sup>, or *Dicer*<sup>102</sup> results in L1  
314 derepression and embryonic lethality. However, mice lacking *FTO*<sup>103</sup> or *MPP8*<sup>32</sup> are viable, likely due to  
315 compensatory mechanisms, as evidenced by increased TASOR binding in the absence of *MPP8*<sup>18,33</sup>.

316 Our study reveals that TASOR depletion impedes the proper transition of ESCs out of naïve  
317 pluripotency in a MAVS-dependent manner, resulting in CASPASE-dependent apoptosis. This cell death  
318 can be mitigated by Emricasan. Furthermore, TASOR loss triggers a P53-P21-Rb mediated DNA damage  
319 response and G2 cell cycle arrest, a phenomenon similarly observed in cells<sup>87,88</sup> and cancer models where  
320 L1 retrotransposon significantly impacts cancer growth and progression<sup>32,87,104</sup>.

321 In conclusion, our findings underscore TASOR’s critical role in the maintenance and exit of naïve  
322 pluripotent state and reveal the intricate relationship between epigenetic regulation and innate immunity  
323 during embryonic development.

324

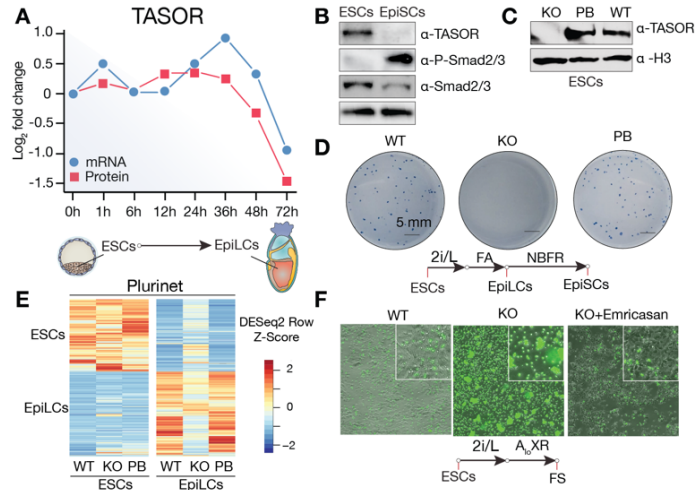

325 **Figure 1. TASOR loss induces cell death during ESC differentiation.**

326 **(A)** Diagram of *Tasor* mRNA and protein levels in naïve ESCs to EpiLCs transition from the stem cell  
 327 atlas database<sup>22</sup>. **(B)** Western blot of mouse embryonic stem cells (ESCs) cultured in 2i/L (Naïve), and  
 328 epiblast stem cells (EpiSCs) cultured in NBFR (Primed). **(C)** Western blot for Wild type (WT), *Tasor*  
 329 knockout (KO), putback (PB), and naïve ESCs cells cultured in 2i/L **(D)** Colony formation assay for naïve  
 330 ESCs cells transitioned to EpiSCs. **(E)** Heatmap of different pluripotency markers between naïve ESCs  
 331 to EpiLCs transition in from the plurinet database<sup>105</sup>. **(F)** SYTOX green cell death staining on cells  
 332 transition to formative cells (FS) cultured for 72h in A<sub>0</sub>XR.

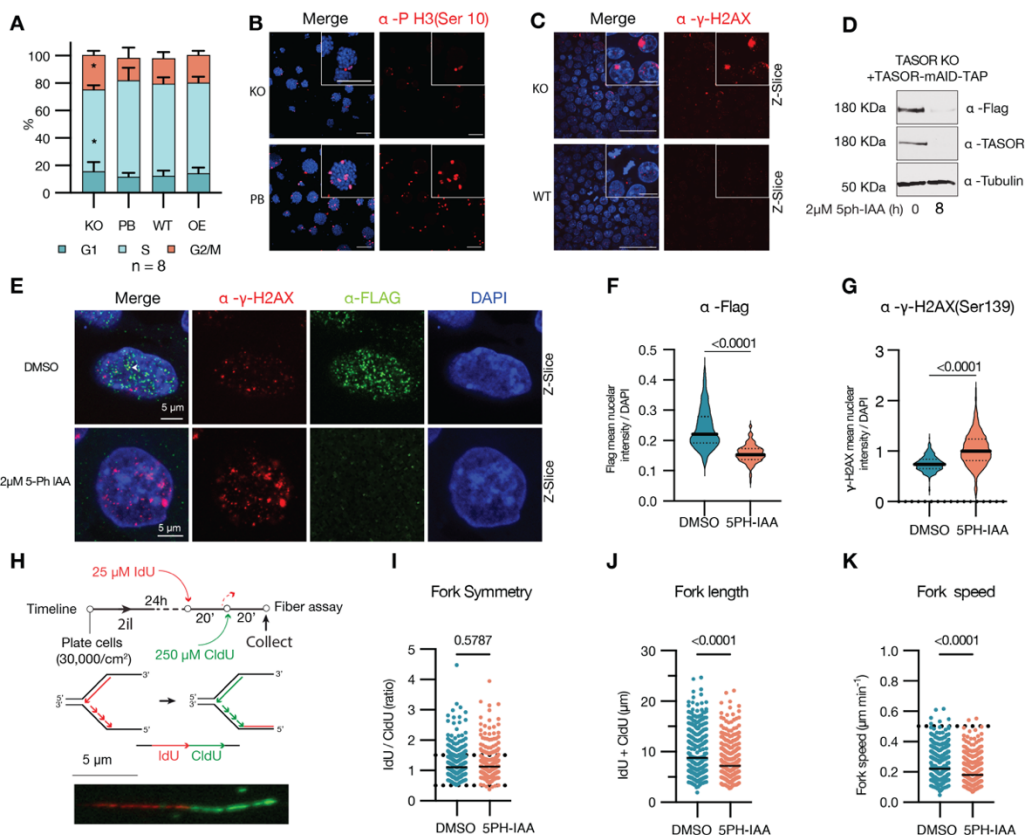

333 **Figure 2. TASOR loss induces cell cycle arrest, DNA damage and DNA replication stress.**

334 **(A)** Flow cytometry cell cycle analysis via Edu incorporation and DNA staining of *Tasor* KO, PB, WT,  
 335 and overexpression (OE) naïve ESCs cultured in 2i/L. **(B)** Immunostaining for the mitosis marker  
 336 phospho H3 (Serine 10) for *Tasor* KO and PB naïve ESCs in 2i/L. **(C)** Immunofluorescence staining of  
 337 WT and *Tasor* KO cells for phosphoserine 139 of histone H2AX ( $\gamma$ H2AX). **(D)** Western blot for TASOR 8  
 338 hours after addition of 2 $\mu$ M 5ph-IAA. **(E)** Z-slice confocal immunofluorescence image for  $\gamma$ H2AX in  
 339 control DMSO or 5-ph-IAA treated cells. **(F)** Mean segmented nuclear intensity normalized to DAPI of  
 340 FLAG Alexa fluor 488. **(G)** Mean segmented nuclear intensity normalized to DAPI of  $\gamma$ H2AX Alexa fluor  
 341 555. **(H)** Diagram of DNA fiber assay with representative image of chromatin fiber. **(I)** Replication fork  
 342 symmetry quantification of chromatin fibers in DMSO or 5-ph-IAA treated cells (n=2). **(J)** Replication  
 343 fork length quantification of chromatin fibers in DMSO or 5-ph-IAA treated cells (n=2). **(K)** Replication  
 344 fork speed quantification of chromatin fibers in DMSO or 5-ph-IAA treated cells (n=2).

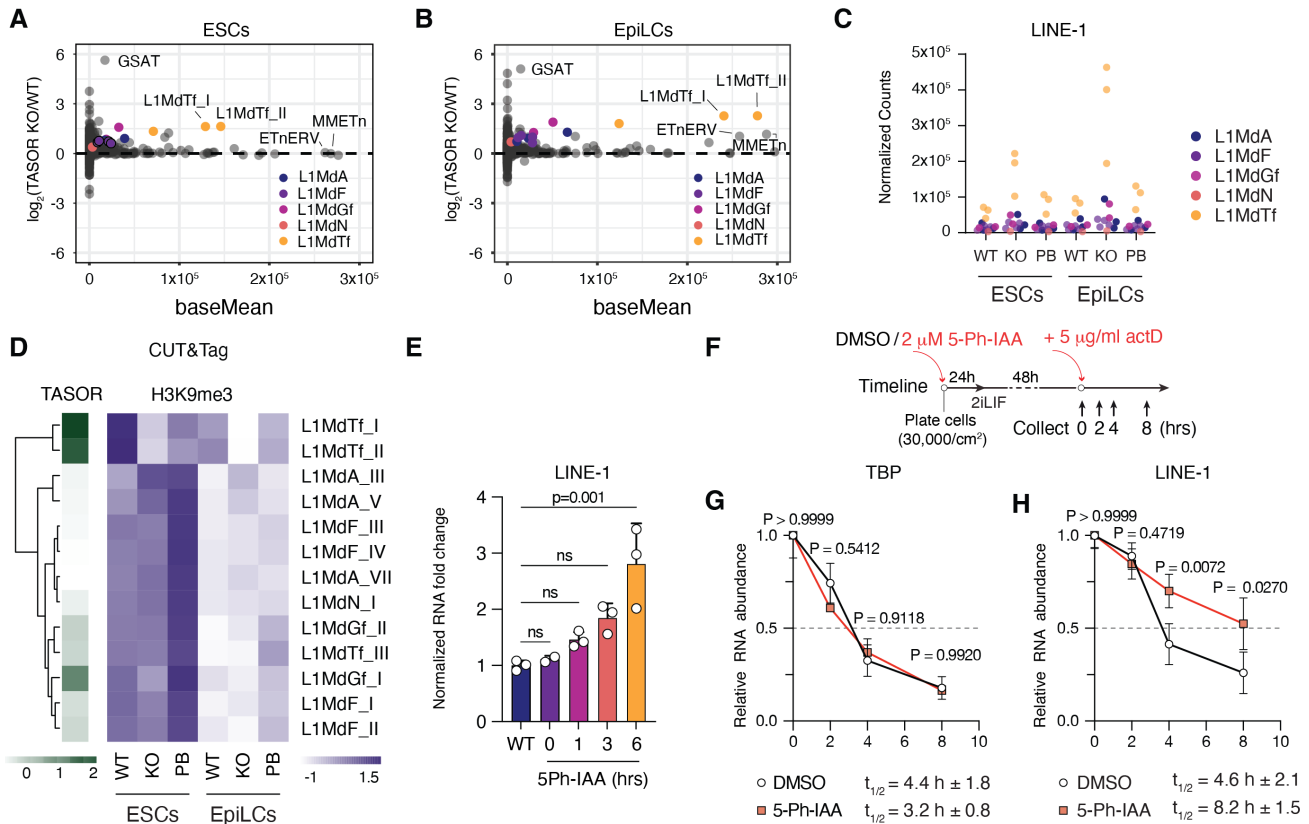

345 **Figure 3. L1 RNA abundance and half-life is increased upon TASOR loss.**

346 **(A)** MA plots for repeats showing  $\log_2$  fold change of *Tasor* KO (KO) over *Wildtype* (WT) in naïve ESCs.  
 347 **(B)** MA plots for repeats showing  $\log_2$  fold change of *Tasor* KO (KO) over *Wildtype* (WT) in EpiLCs. **(C)**  
 348 Normalized average counts for LINE-1 (L1) sub families in naïve ESCs and EpiLCs for WT, KO and  
 349 *Tasor* Putback (PB). **(D)** Heatmap for CUT&Tag of TASOR-3xFlag and H3K9me3 at L1 family members.  
 350 **(E)** Timecourse normalized RNA fold change via qPCR for L1 after Auxin treatment. **(H)** Experimental  
 351 diagram for measuring RNA half live after Actinomycin D (ActD) treatment. **(I)** Relative mRNA  
 352 abundance after ActD treatment for TBP measured by RT-qPCR. **(J)** Relative mRNA abundance after  
 353 ActD treatment for L1 measured by RT-qPCR.

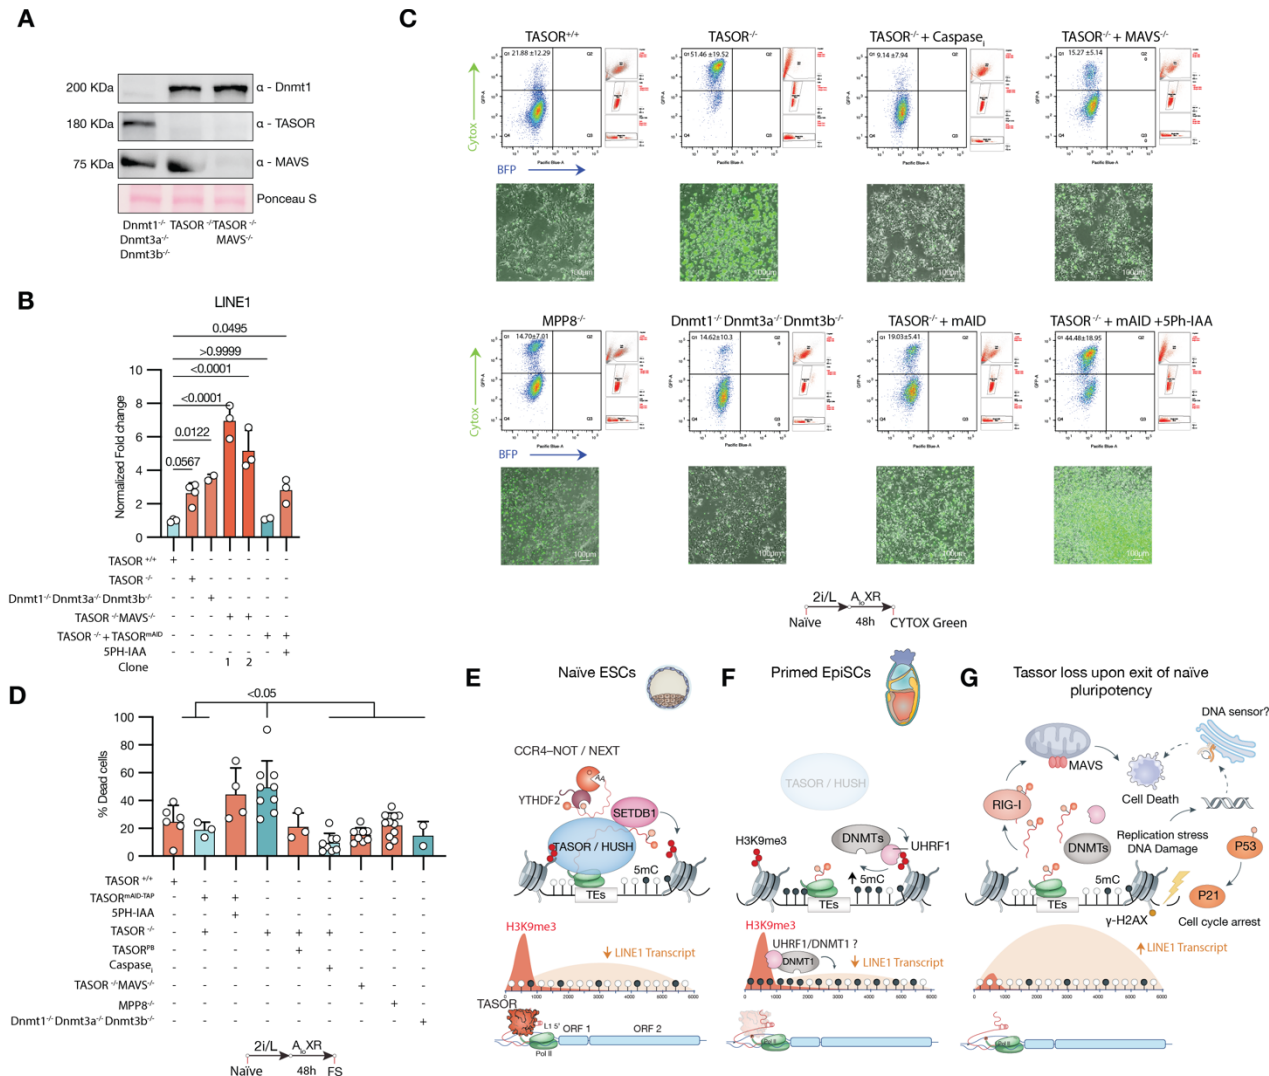

354 **Figure 4. TASOR loss induced cell death is partially mediated by a MAVS innate immune**  
355 **response.**

356 **(A)** Western blot for DNMT1, TASOR and MAVS for Dnmt triple knockout (KO, *Dnmt1*, *Dnmt3a*, *Dnmt3*),  
357 *Tasor* KO, TASOR and MAVS double KO cells. **(B)** RT-qPCR for L1abundance in Wild type, *Tasor* KO,  
358 *Dnmt3x*KO, *Tasor* and *MAVS* double KO cells, and TASOR mAID with and without 2μM 5ph-IAA  
359 treatment. **(C)** Representative epifluorescence images for cell death via SYTOX green staining (bottom)  
360 and flow cytometry analysis (top) after 48 hours of AtoXR formative cell conversion. **(D)** Flow cytometry  
361 quantification of the percent of dead cells measured via SYTOX green dead cell staining. **(E)** Proposed  
362 model diagram: in naïve ESCs, L1s and repeats are transcribed by Pol II, the nascent RNA transcript  
363 gets recognized by HUSH, which then recruits SETDB1 for depositing H3K9me3 with the help of the  
364 ATPase chromatin remodeler (MORC2) (not shown), the RNA transcript is marked by m6a, recognized  
365 by YTHDC1 and the RNA is targeted for degradation by the NEXT and the CCR4-CNOT complex. **(F)**  
366 In primed cells, TASOR is downregulated, and the H3K9me3 marked sites get targeted for 5mC CpG  
367 DNA methylation and long-term silencing. The UHRF1 Dnmt1 read-and-write model for the H3K9me3  
368 and 5mC cross talk is depicted. **(G)** In *Tasor* KO ESCs upon exit of naïve pluripotency L1 transcripts  
369 are recognized possible by a RIG-I sensor and initiates a MAVS mediated “innate immune checkpoint”.  
370 The observed DNA damage and P53-P21-Rb mediated cell cycle arrest is depicted, as well as a  
371 possible DNA stimulated innate immune response.

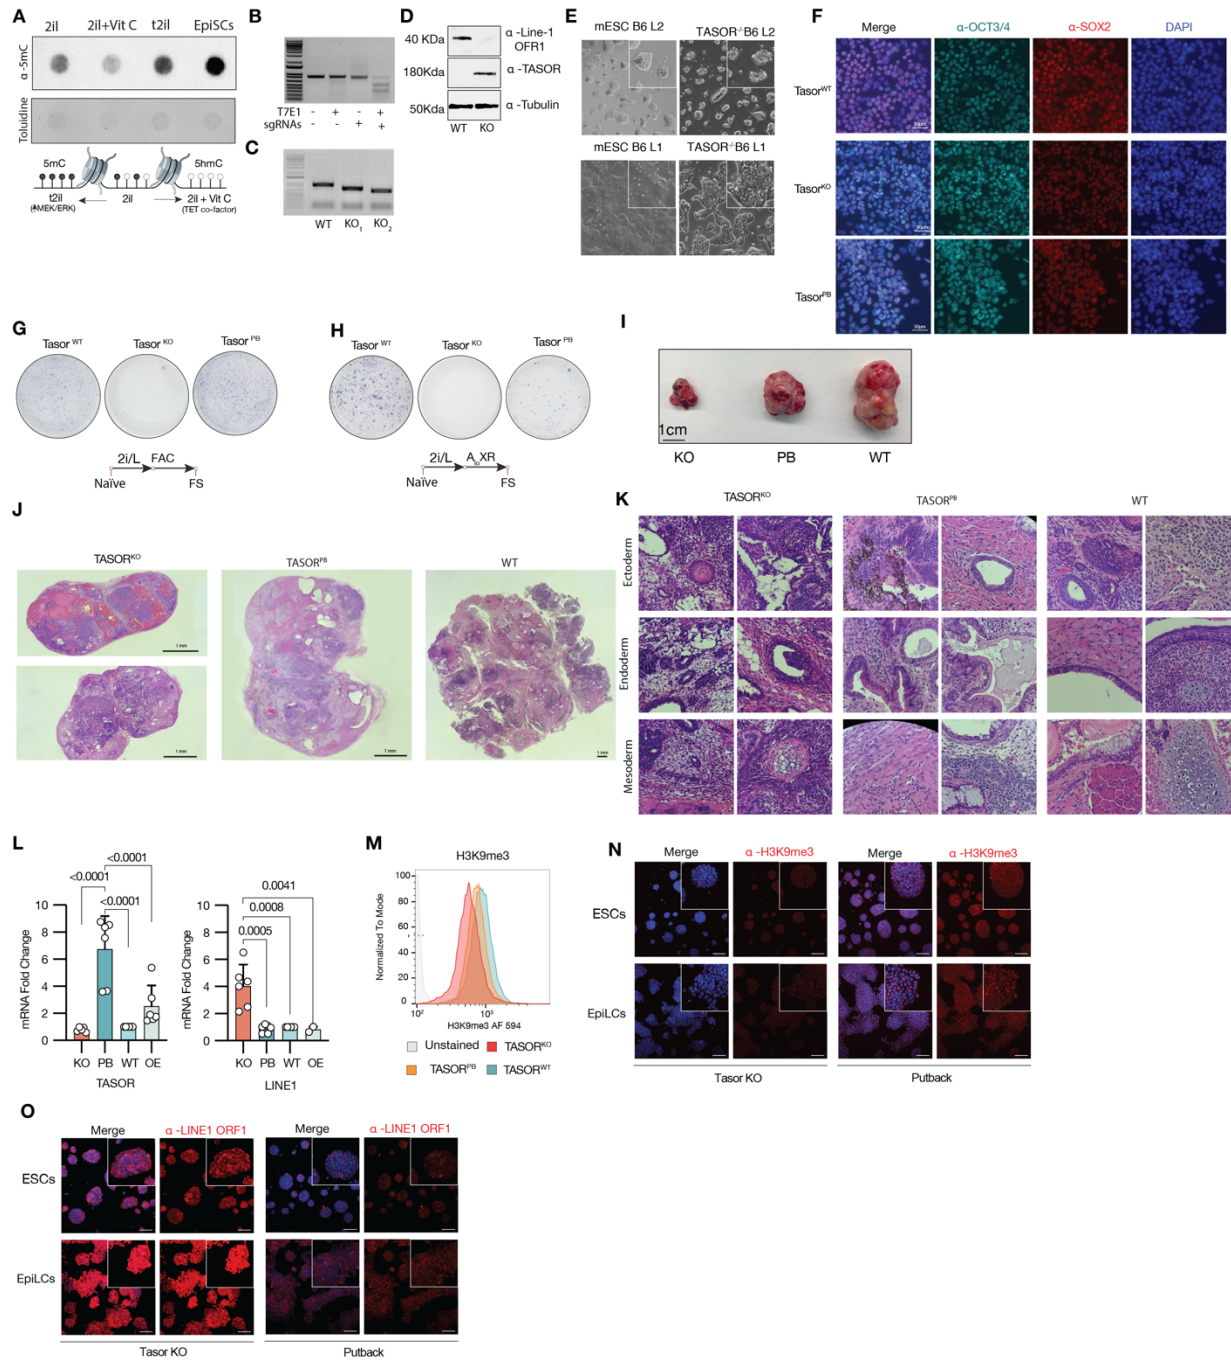

372 **Supplementary Figure 1. TASOR loss characterization in naïve ESCs**



373 **(A)** DNA dot blot for 5mC and toluidine blue staining of genomic DNA from mouse ESCs cultured in  
374 2i/L, PD03 titrated 2i/L (t2i/L), 2i/L plus vitamin C (2i/L +Vit C). **(B)** Agarose gel electrophoresis of T7  
375 endonuclease assay for *Tasor* CRISPR-CAS9 sgRNAs validation. **(C)** Agarose gel electrophoresis of  
376 *Tasor* knockout (KO) genotyping for line 2 and line 2. s 1 and  
377 2. **(D)** Western blot for L1 ORF1 and TASOR in *Tasor* KO clone. **(E)** Immunofluorescence staining of  
378 OCT4, SOX2 and DAPI, for *Tasor* WT, KO, and PB cells. **(F)** Brightfield color images of colonies after  
379 FAC (also known as FTW) formative cell conversion. **(G)** Brightfield color images of colonies after AloxR  
380 formative cell conversion. **(H)** Representative teratomas of *Tasor* KO, PB, and WT naïve mPSCs. **(I)**  
381 Panoramic stich of brightfield images of hematoxylin and eosin (H&E) depicting gross tissue  
382 morphology of *Tasor* KO, PB and Wild type teratomas. **(J)** H&E staining of *Tasor* KO, PB and Wild type  
383 teratomas depicting histological morphology for Ectoderm, Endoderm, and Mesoderm. **(K)** RT-qPCR  
384 results for TASOR and L1 in KO, PB, WT and OE. **(L)** Flow cytometry analysis for global levels of  
385 H3K9me3 in *Tasor* KO, PB, WT and OE naïve cells. **(M)** Immunofluorescent staining for H3K9me3 in  
386 *Tasor* Ko and Putback naïve mPSCs (2i/L) and EpiLCs (FA). **(N)** Immunofluorescent staining for L1  
387 ORF1 in *Tasor* Ko and Putback naïve mPSCs (2i/L) and EpiLCs (FA).

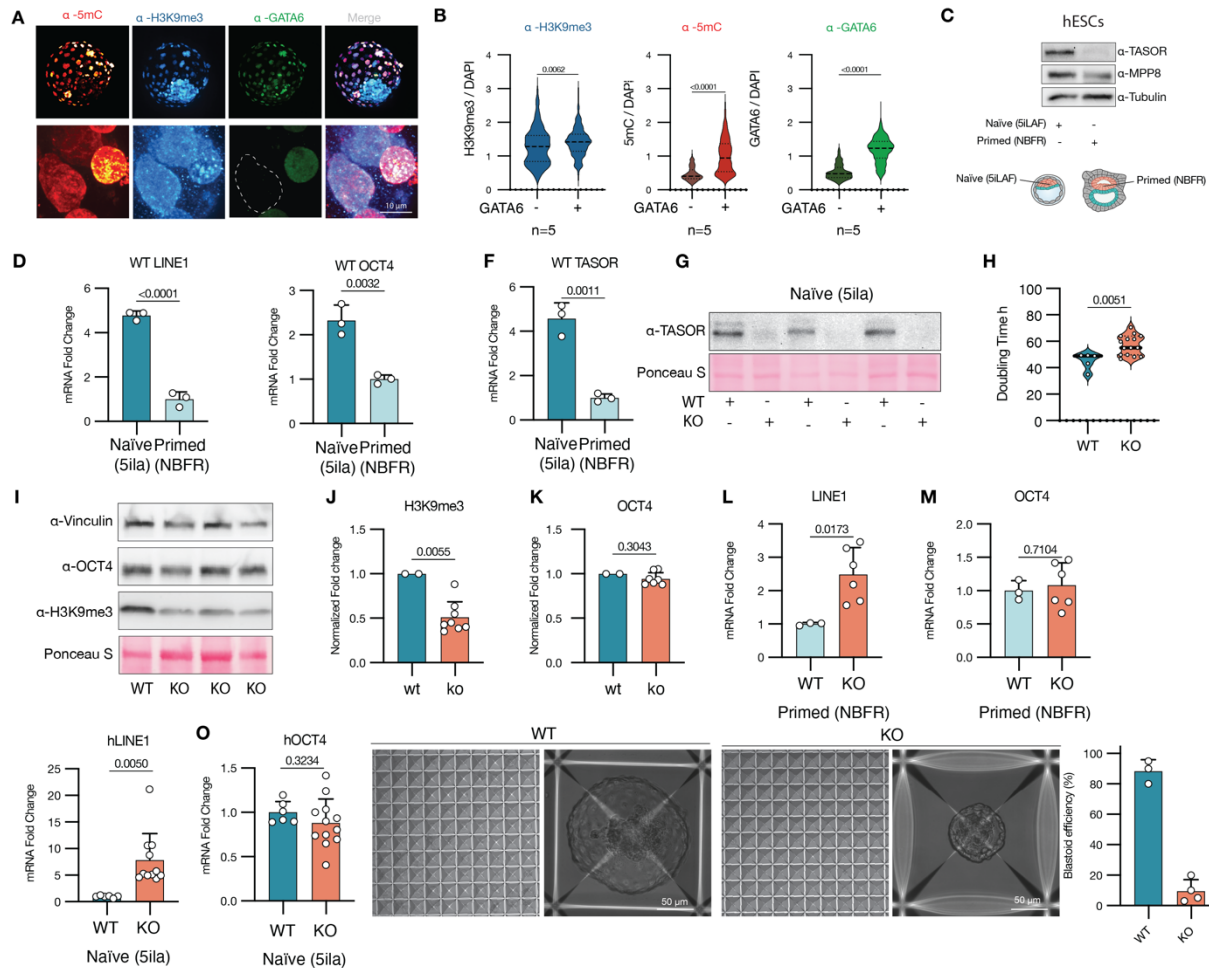

### 388 Supplementary Figure 2. TASOR loss characterization in human PSCs

389 **(A)** Representative immunofluorescent staining of human blastoids derived from naive human ESCs for  
390 differentiation marker GATA6, H3K9me3, and DNA 5mC methylation. **(B)** Quantification of H3K9me3,  
391 5mC and GATA6, comparing GATA6 positive (Trophectoderm and hypoblast) and GATA6 negative  
392 (Epiblast) cells in Wild type blastoids, depicting 5mC methylation gain upon exit of naive pluripotency.  
393 **(C)** Western blot of human ESCs cultured in 5i/la (Naive) and ESCs cultured in NBFR (Primed). RT-  
394 qPCR mRNA fold change between naive (5iLAF) and primed (NBFR) human WIBR3  $\Delta$ PE-OCT4 GFP ESCs  
395 for **(D)** L1 (L1P), **(E)** OCT4, and **(F)** TASOR. **(G)** Western blot for *TASOR* knockout clones in human naive  
396 WIBR3  $\Delta$ PE-OCT4 GFP ESCs. **(H)** Doubling time between *Tasor* Wild type (WT) and knockout (KO)  
397 cells. **(I)** Western blot for *Tasor* KO and WT clones in human naive WIBR3  $\Delta$ PE-OCT4 GFP cells, for  
398 OCT4, and H3K9me3. **(J)** Loading control normalized relative protein level between *TASOR* KO and  
399 WT for H3K9me3. **(K)** Loading control normalized relative protein level between KO and WT for OCT4  
400 **(L)** RT-qPCR mRNA fold change between WT and KO primed human ESCs for L1 (L1P). **(M)** RT-qPCR  
401 mRNA fold change between WT and KO primed human ESCs for OCT4. **(N)** RT-qPCR mRNA fold  
402 change between WT and KO naive human ESCs for L1. **(O)** RT-qPCR mRNA fold change between WT  
403 and KO naive human ESCs for OCT4. **(P)** Brightfield image of aggrewell plate depicting blastoid  
404 formation efficiencies in *TASOR* WT and KO ESCs. **(Q)** Quantification of blastoid formation efficiency  
405 between *TASOR* WT and KO ESCs.

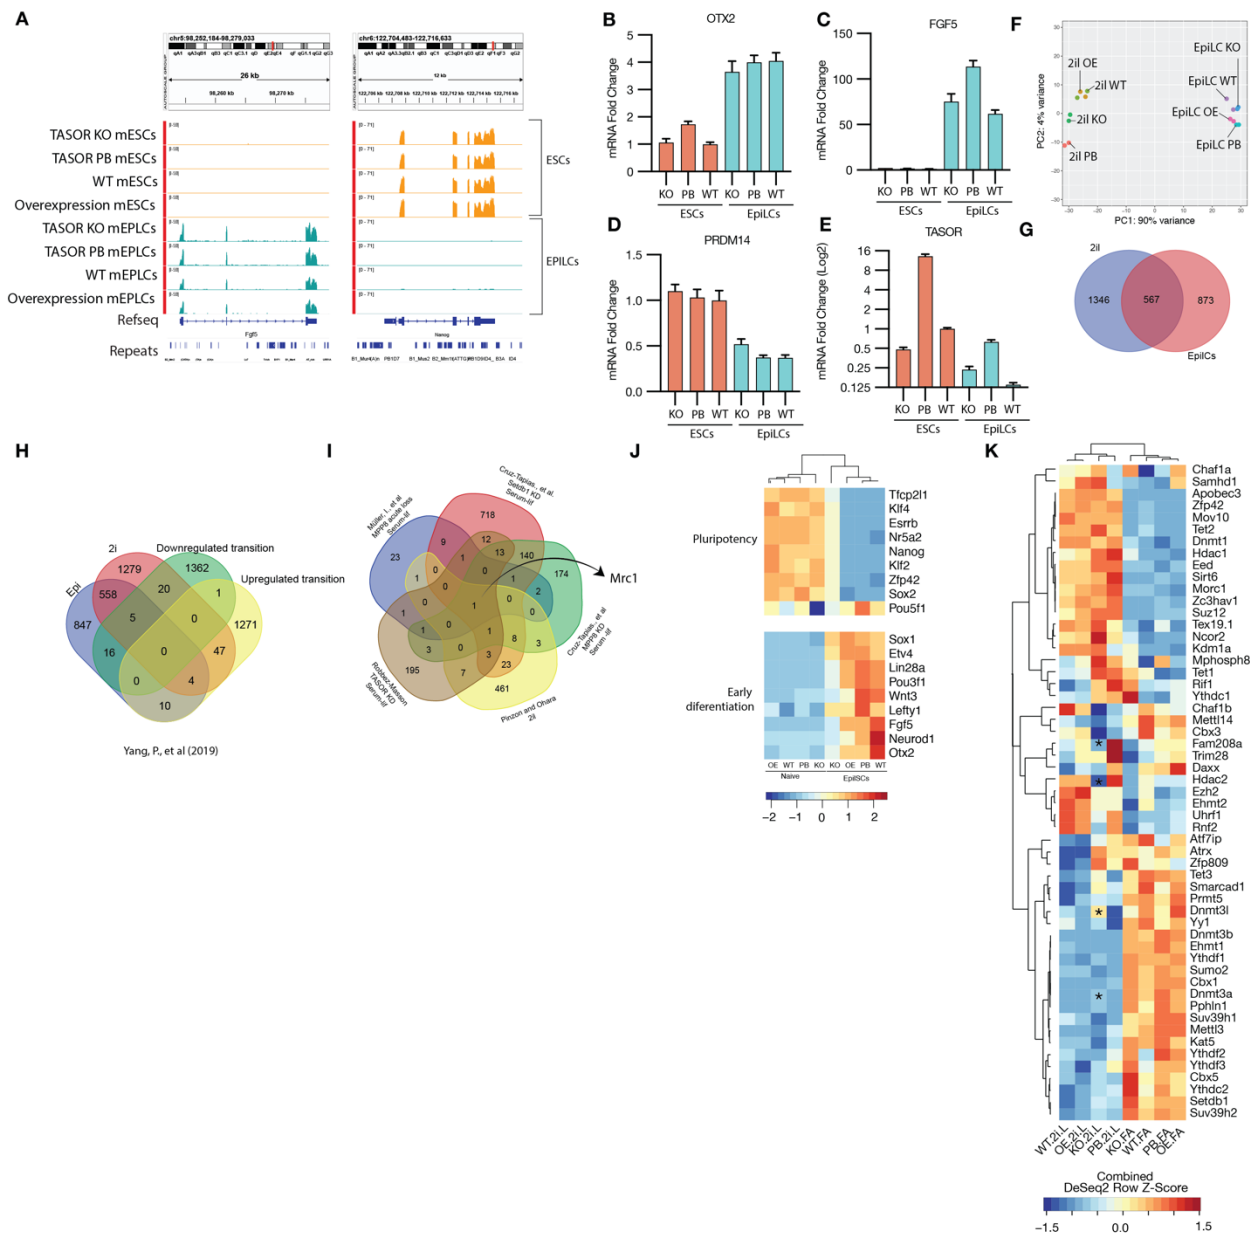

406 **Supplementary Figure 3. RNAseq characterization of naïve ESCs and EpiLCs upon *TASOR* loss**

407 **(A)** IGV RNAseq tracks for *Tasor* knockout (KO), putback (PB), and Wild type (WT), overexpression (OE)  
 408 naïve mouse ESC (2i/L) and EpiLCs (FA) depicting expression of *FGF5* and *NANOG*. **(B)** RT-qPCR  
 409 mRNA fold change between WT, KO and PB mouse ESCs and EpiLCs for *OTX2*. **(C)** RT-qPCR mRNA  
 410 fold change between WT, KO and PB mouse ESCs and EpiLCs for *FGF5*. **(D)** RT-qPCR mRNA fold  
 411 change between WT, KO and PB mouse ESCs and EpiLCs for *PRDM14*. **(E)** RT-qPCR mRNA fold  
 412 change between WT, KO and PB mouse ESCs and EpiLCs for *Tasor*. **(F)** Principal component analysis  
 413 of Naïve and EpiLCs samples. **(G)** Venn diagram of differentially expressed genes (DEGs) between  
 414 *TASOR* KO and WT, PB, OE in naïve and EpiLCs. **(H)** Venn diagram of DEGs in naïve ESCs (2i/L) and  
 415 EpiLCs (48h FA) compared to up regulated and downregulated genes in Naïve to EpiLCs transition in  
 416 the stem cell atlas database<sup>22</sup>. **(I)** Venn diagram shown the common upregulated genes between  
 417 our datasets and Cruz-Tapias, et al MPP8 knockdown and SETDB1 knockdown<sup>106</sup>, Müller, I., et al  
 418 MPPP8 acute loss<sup>54</sup> and Robbez-Masson<sup>18</sup>. **(J)** Heatmap of different pluripotency and early  
 419 differentiation markers between *Tasor* KO, PB, WT, OE naïve mouse ESC (2i/L) and EpiLCs (FA). **(K)**

420 Heatmap of different epigenetic markers between *Tasor* KO, PB, WT, OE naïve mouse ESC (2i/L) and  
421 EpiLCs (FA).

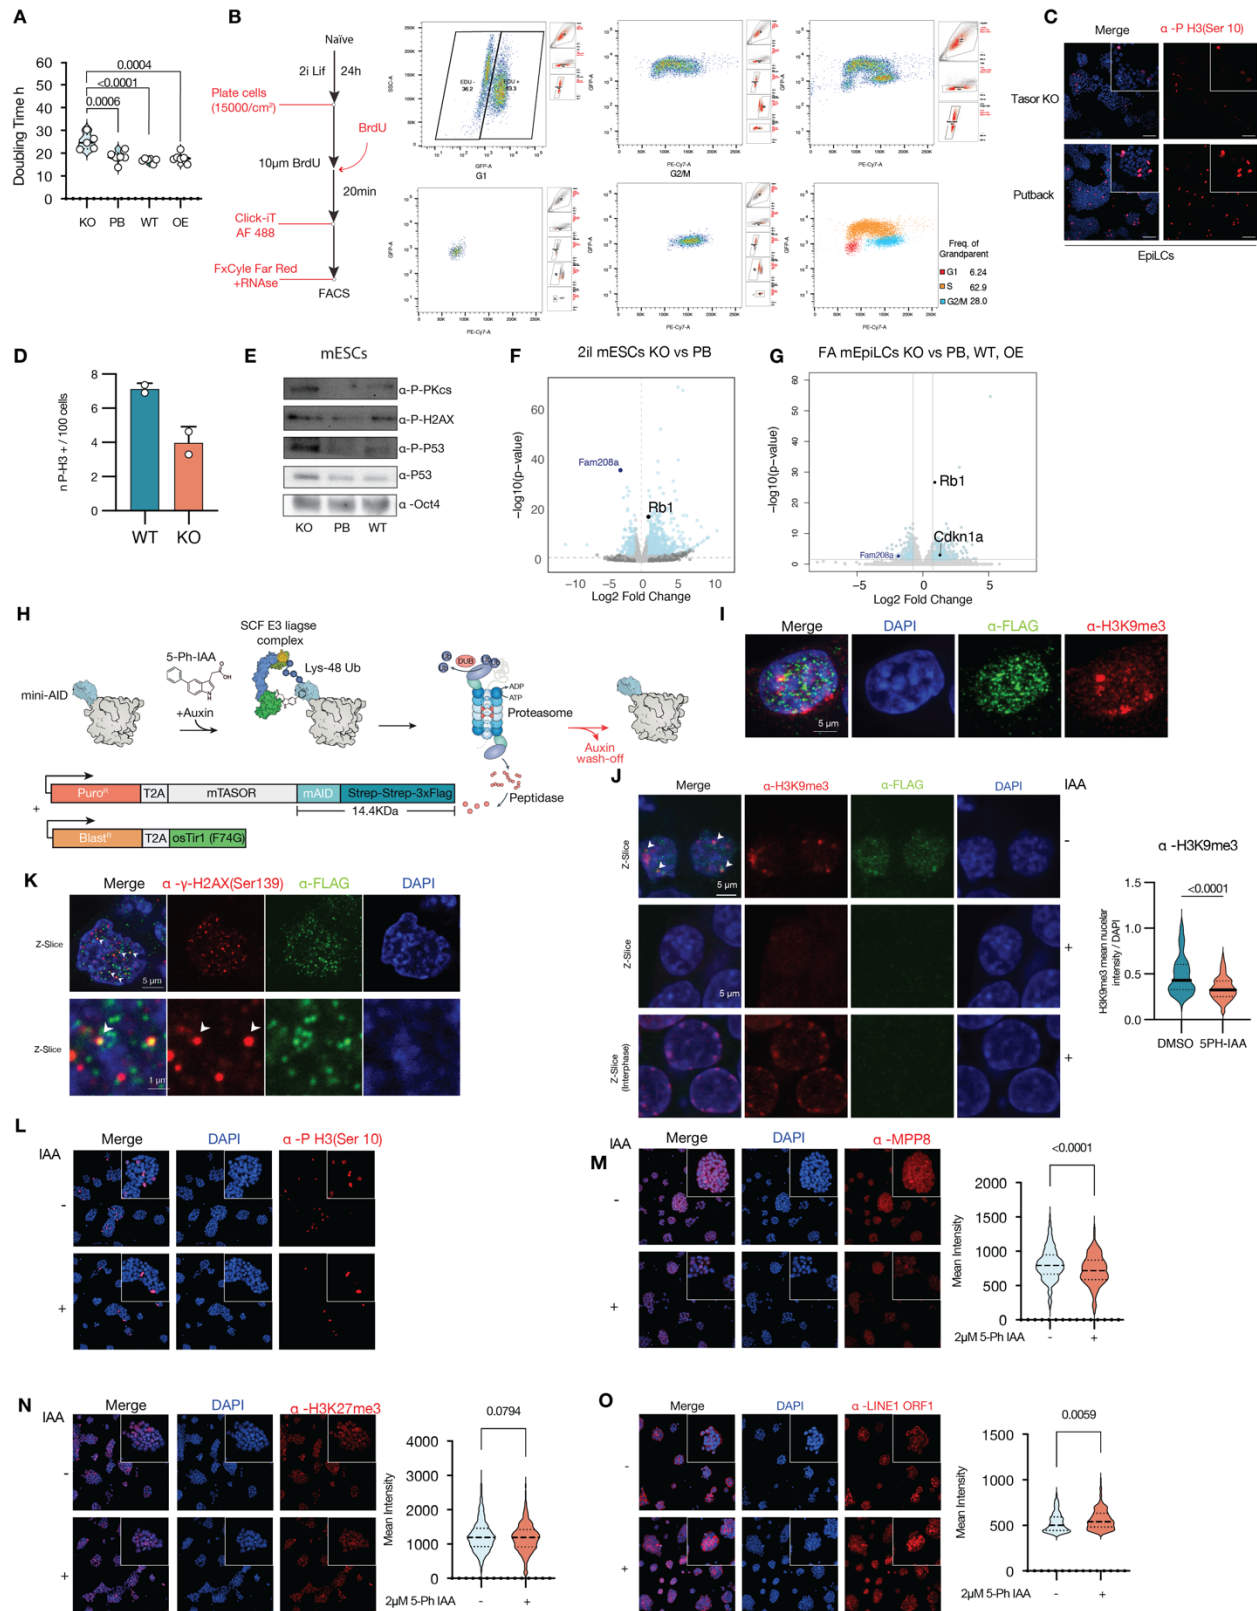

422 **Supplementary Figure 4. *TASOR* loss induces DNA damage and cell cycle arrest.**

423

424 **(A)** Doubling time of *Tasor* KO, putback (PB), Wild type (WT) and overexpression (OE). **(B)** Diagram for cell  
425 cycle analysis via BrdU incorporation and Click-it AF488 staining with FxCycle far red DNA stain with  
426 RNase treatment, gating strategy to separate S, G1 and G2/M population is shown, percentages of  
427 grandparent population are shown. **(C)** Immunofluorescence staining for for the mitosis marker phospho  
428 H3 (Serine 10) of KO EpiLCs (FA). **(D)** Quantification of phospho H3 positive cells per 100 cells. **(E)** Western  
429 blot for DNA damage markers phospho DNA protein kinase catalytic subunit (DNAPKcs) serine 2056, for  
430 phosphoserine 139 of histone H2AX ( $\gamma$ H2AX), and phosphoserine 15 of P-53 in naïve cells. **(F)** Volcano  
431 plot for naïve ESCs compared to putback, depicting the upregulation of *RB1* transcript. **(G)** Volcano plot  
432 for EpiLCs compared to PB, WT and OE, depicting the derepression of *Rb1* and *Cdkn1a* (*P21*). **(H)** Diagram  
433 of the auxin-inducible degron 2 constructs. **(I)** Z-slice confocal immunofluorescence image for H3K9me3  
434 and FLAG; white arrows indicate colocalization spots. **(J)** Z-Slice confocal image of immunofluorescence  
435 staining for H3K9me3 and Flag with DAPI counterstaining for TASOR-mAID-TAP, bottom depicts cells in  
436 interphase with H3K9me3 chromocenters associated to the nuclear lamina. **(K)** Z-Slice confocal image of  
437 immunofluorescence staining for phosphoserine 139 of histone H2AX ( $\gamma$ H2AX) and Flag with DAPI  
438 counterstaining for TASOR-mAID-TAP. **(L)** Maximum intensity projection immunofluorescence staining for  
439 phosphor H3 of *Tasor* knockout (KO) naïve mPSCs recued with TASOR-mAID-TAP with or without 2 $\mu$ M  
440 5-Ph IAA during 48h for **(L)** phospho H3, **(M)** MPP8, **(N)** H3K27me3, and **(O)** L1 ORF1.

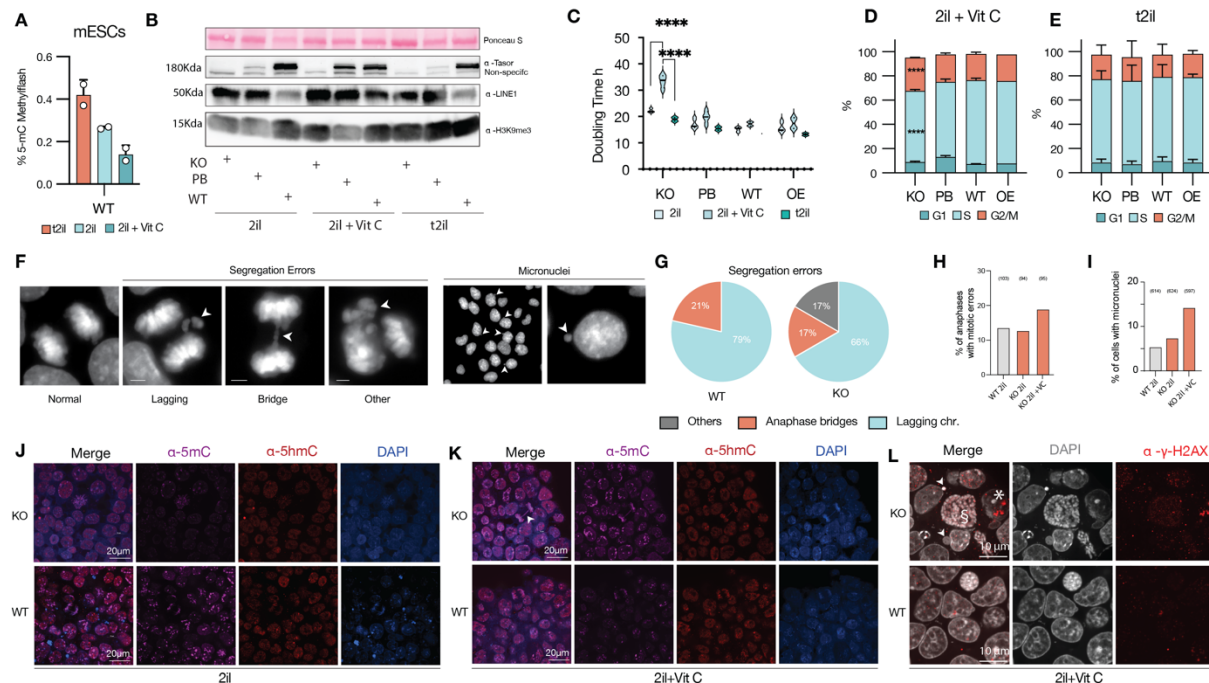

441 **Supplementary Figure 5. *Tasor* KO naïve mPSCs are sensitized to Vit C induced hypomethylation.**

442 **(A)** Methylflash quantification of 5mC levels in naïve mPSCs cultured in cultured in 2i/L (1 $\mu$ M PD03),  
 443 t2i/L (0.3 $\mu$ M PD03) and 2i/L with vitamin C. **(B)** Flow cytometry cell cycle analysis via Edu Incorporation  
 444 and DNA staining for cells in 2i/L+Vit C. **(C)** Flow cytometry cell cycle analysis via Edu Incorporation  
 445 and DNA staining for cells in t2i/L. **(D)** Doubling time quantification in naïve mPSCs *Tasor* knockout  
 446 (KO), putback (PB), Wild type (WT), and overexpression (OE) cultured in 2i/L, t2i/L and 2i/L with vitamin  
 447 C, depicting *Tasor* KO naïve mPSCs sensitivity to vitamin C. **(E)** Western blot of *Tasor* knockout (KO),  
 448 putback (PB), and Wild type (WT) in cells cultured in 2i/L, t2i/L and 2i/L with vitamin C for H3K9me3,  
 449 L1 ORF-1 and TASOR. **(F)** Confocal epifluorescence images depicting different types of segregation  
 450 errors and micronuclei. **(G)** Quantification of segregation errors between mouse *Tasor* knockout (KO)  
 451 and Wild type (WT). **(H)** Quantification of percent of anaphases with mitotic errors between mouse  
 452 *Tasor* knockout (KO) and Wild type (WT) in 2i/L or 2i/L plus vitaminic C. **(I)** Quantification of percent of  
 453 cells with micronuclei between mouse *Tasor* knockout (KO) and Wild type (WT) in 2i/L or 2i/L plus  
 454 vitaminic C. **(J)** Immunofluorescence staining for 5mC and 5hmC with DAPI counterstaining of *Tasor*  
 455 knockout (KO) and wiltype (WT) naïve mPSCs cultured in 2i/L. **(K)** Immunofluorescence staining for  
 456 5mC and 5hmC with DAPI counterstaining of *Tasor* knockout (KO) and wiltype (WT) naïve mPSCs  
 457 cultured in 2i/L plus vitamin C. **(L)** Z-slice confocal immunofluorescence for phosphoserine 139 of  
 458 histone H2AX ( $\gamma$ H2AX) with DAPI counterstaining of *Tasor* knockout (KO) naïve mPSCs cultured in 2i/L  
 459 plus vitamin c, depicting DNA damage (\*), micronuclei (arrow head) and accumulation of abnormal  
 460 karyotype(\$).

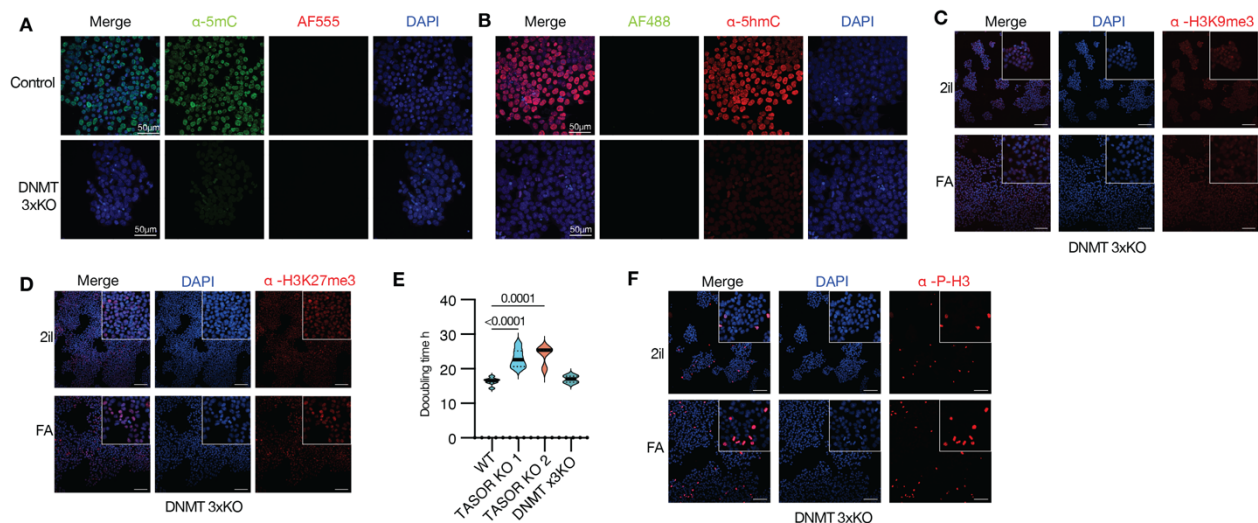

461 **Supplementary Figure 6. Characterization of DNMTx3KO naïve ESCs and EpiLCs.**

462 (A) Immunofluorescence staining for 5mC with DAPI counterstaining for Dnmt1, Dnmt3a and Dnmt3b  
 463 triple knockout (Dnmt x3KO) and control naïve ESCs cultured in 2i/L. (B) Immunofluorescence staining  
 464 for 5hmC with DAPI counterstaining for Dnmt x3KO and control naïve ESCs cultured in 2i/L. (C)  
 465 Immunofluorescent staining for H3K9me3 in Dnmt x3KO naïve ESCs (2i/L) and EpiLCs (FA).  
 466 (D) Immunofluorescent staining for H3K27me3 in Dnmt x3KO naïve mPSCs (2i/L) and EpiLCs (FA).  
 467 (E) Doubling time of Wild type, *Tasor* KO and Dnmt x3KO naïve mPSCs cultured in 2i/L. (F)  
 468 Immunofluorescence staining for the mitosis marker phospho H3 (Serine 10) of Dnmt triple KO naïve  
 469 mPSCs (2i/L) and EpiLCs (FA).



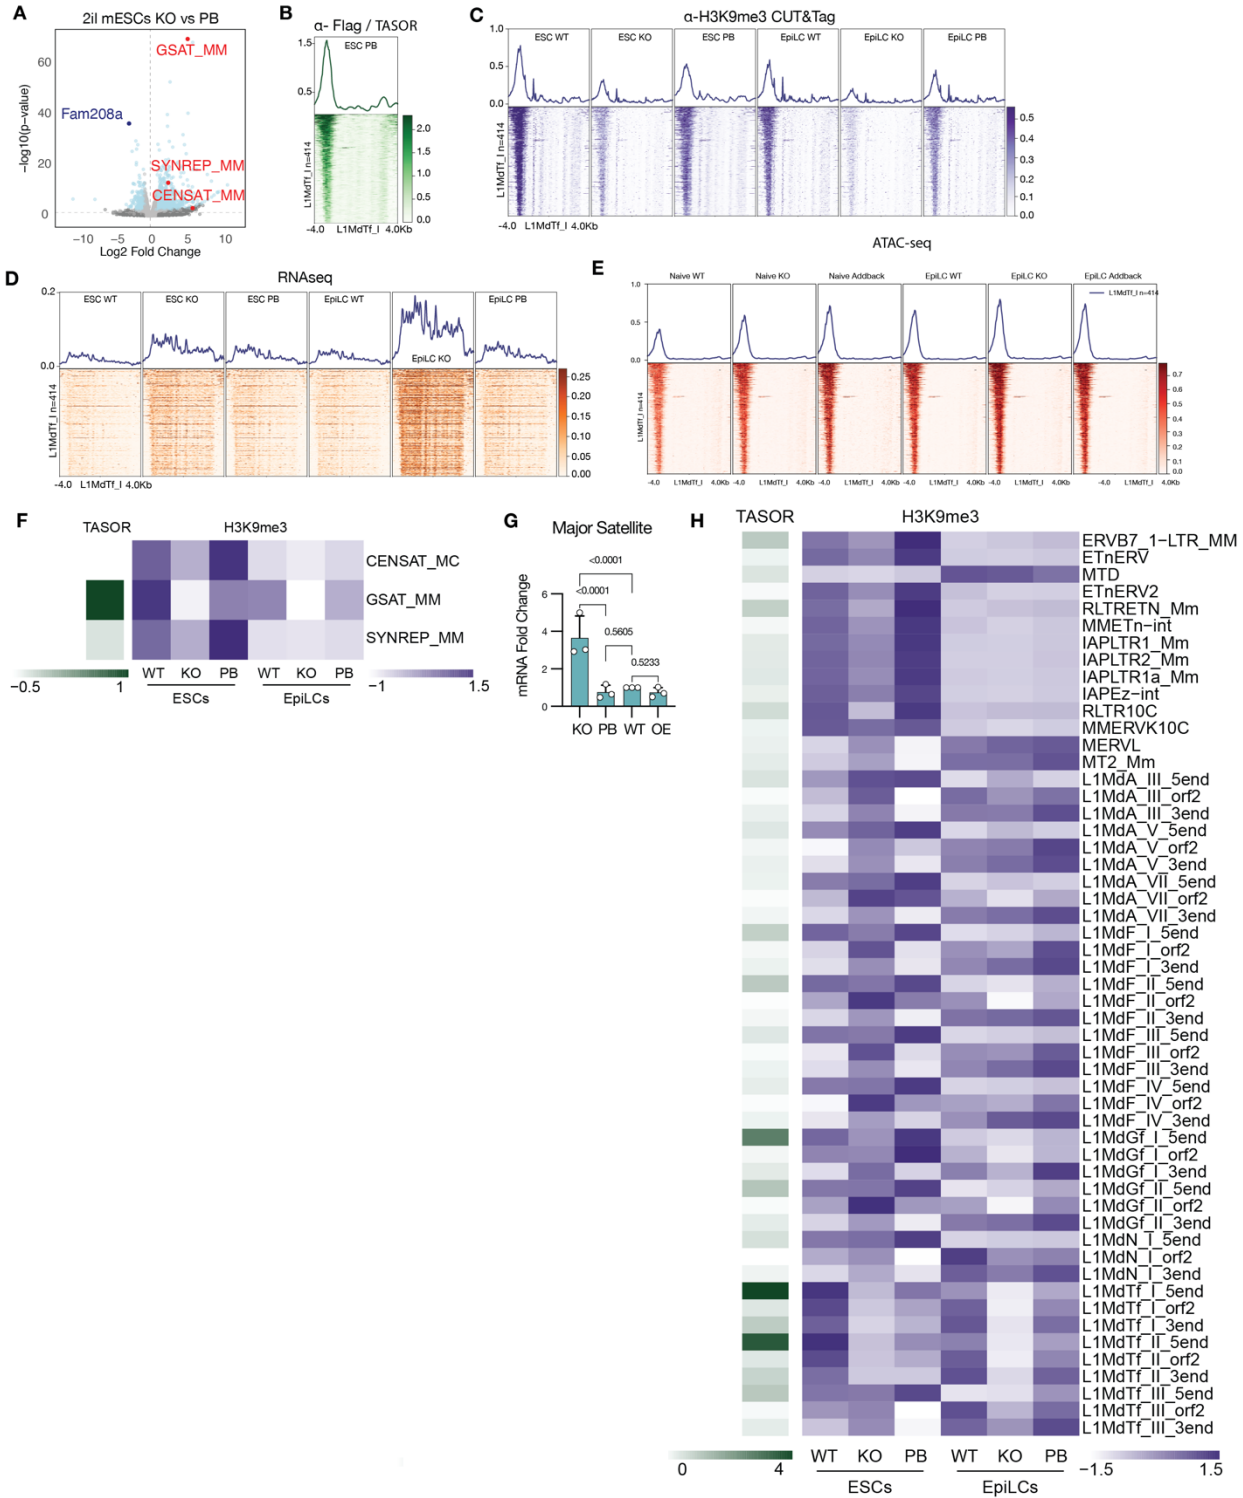

470 **Supplementary Figure 7. Epigenetic profiling of H3K9me3 and TASOR-3xFLAG reveals *Tasor***  
 471 **regulation of L1 and repeats.**

472 **(A)** Volcano plot for naïve ESCs compared to putback, depicting the derepression of General satellite  
473 repeats (GSAT\_MM), Simple or minor Repeats (SYNREP\_MM), and Centromeric satellite repeats  
474 (CENSAT\_MC). **(B)** Average CUT&Tag profiles (top) and heatmaps (bottom) at L1MdTf\_I (n=414) for  
475 TASOR-3xFlag. **(C)** Average CUT&Tag profiles (top) and heatmaps (bottom) at L1MdTf\_I (n=414) for  
476 H3K9me3. **(D)** Average RNAseq profiles (top) and heatmaps (bottom) at L1MdTf\_I (n=414). **(E)** Average  
477 ATACseq profiles (top) and heatmaps (bottom) at L1MdTf\_I (n=414) for H3K9me3. **(F)** Heatmap for  
478 CUT&Tag of TASOR-3xFlag and H3K9me3 at General satellite repeats (GSAT\_MM), Simple or minor  
479 Repeats (SYNREP\_MM), and Centromeric satellite repeats (CENSAT\_MC). **(G)** RT-qPCR mRNA fold  
480 change between *Tasor* KO, PB, WT naïve mouse ESC (2i/L) for Major satellite repeats RNA. **(H)**  
481 Heatmap for CUT&Tag of TASOR-3xFlag and H3K9me3 at different retroviral families.

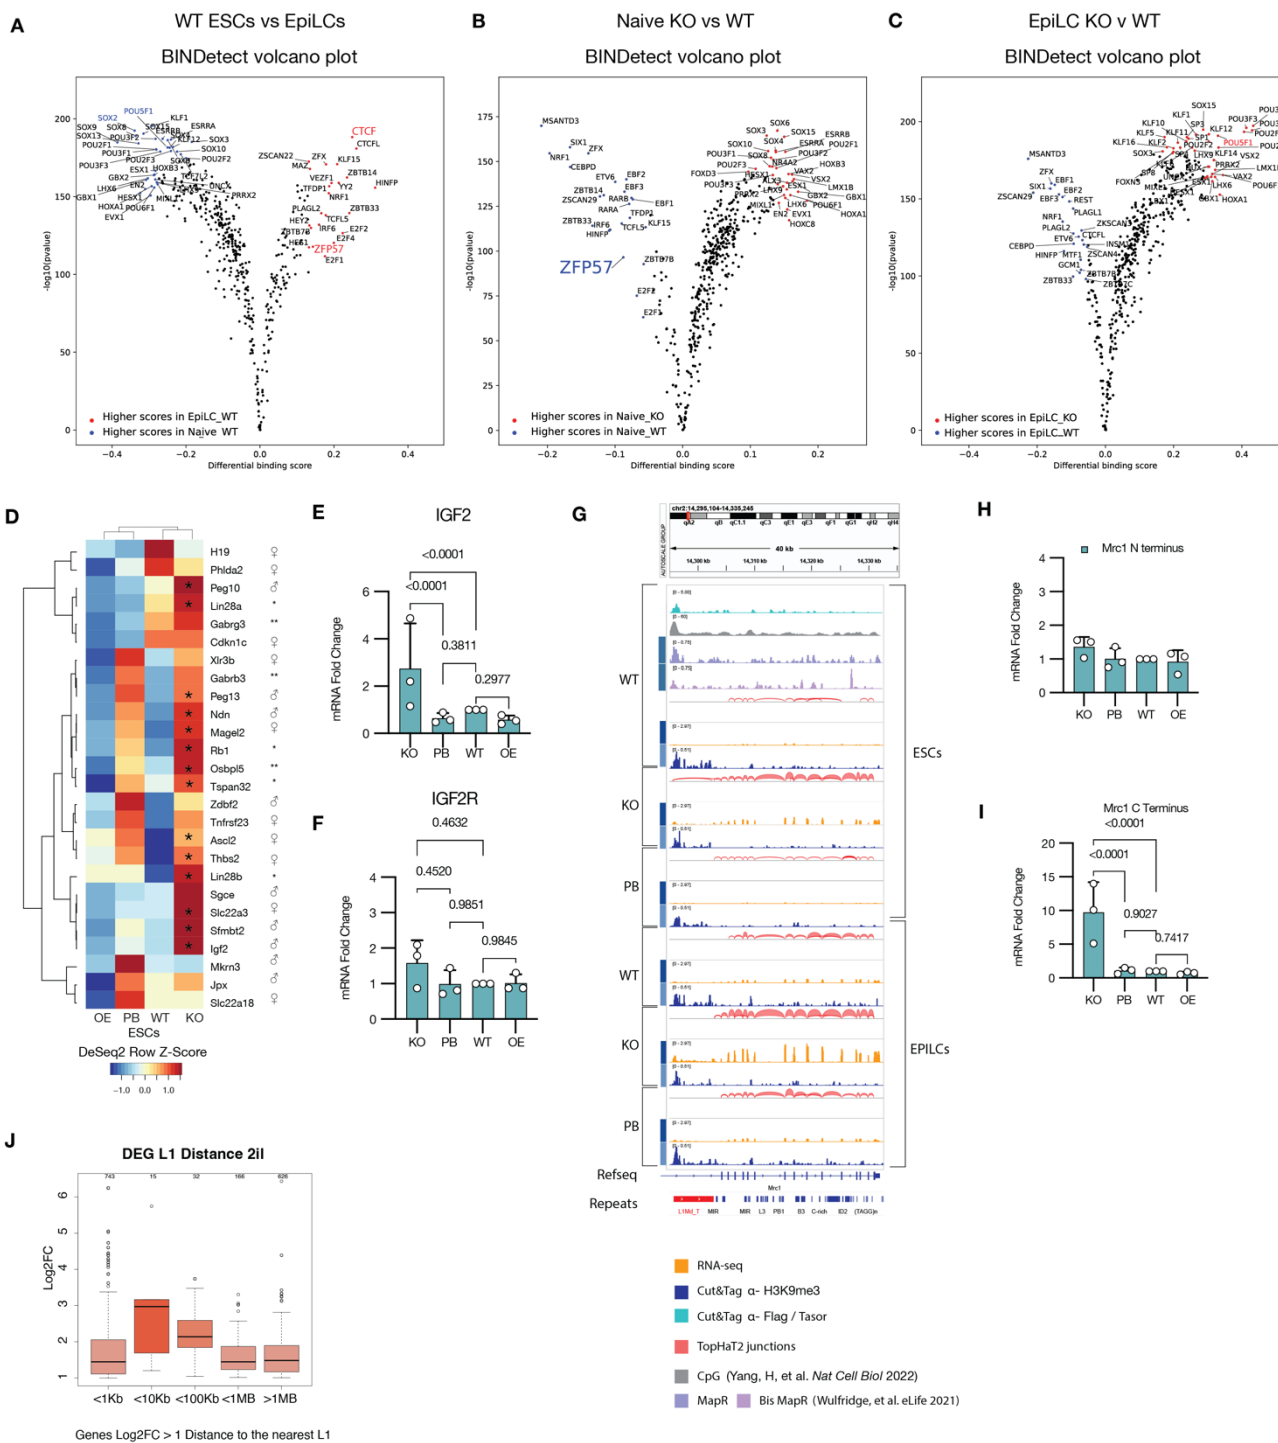

482 **Supplementary Figure 8. Analysis of Tasor KO cells differentially expressed genes and ATAC peaks.**

483 **(A)** Differential transcription factor binding scores from ATAC data using BINDetect between Wild type  
484 naïve mouse ESC (2i/L) and EpiLCs (FA). **(B)** Differential transcription factor binding scores from ATAC  
485 data using BINDetect between *Tasor* KO versus WT naïve mouse ESC (2i/L). **(C)** Differential  
486 transcription factor binding scores from ATAC data using BINDetect between *Tasor* KO versus WT  
487 EpiLCs. **(D)** Heatmap of different differentially expressed imprinted genes in naïve mouse ESC (2i/L). \*  
488 Represent significant differentially expressed genes,  $\log_2$  fold change  $\geq 1$ ,  $p\text{-val} \leq 0.05$ . **(E)** RT-qPCR  
489 mRNA fold change between *Tasor* KO, PB, WT naïve mouse ESC (2i/L) for *IGF2*. **(G)** **(F)** RT-qPCR  
490 mRNA fold change between *Tasor* KO, PB, WT naïve mouse ESC (2i/L) for IGF2 receptor (*IGF2R*). **(G)**  
491 IGV tracks for RNAseq (Orange), Cut&Tag tracks for TASOR-3xFLAG(Teal), H3K9me3 (dark blue),  
492 ToPHAT2 junctions(red), CpG number from Yang, et al<sup>107</sup> and R-loops from Wulfridge, et al<sup>85</sup>, in *Tasor*  
493 KO, PB, WT naïve mouse ESC (2i/L) and EpiLCs (FA), depicting the position effect varigenation of L1s  
494 affecting nearby gene expression upon TASOR loss. and R-loops from Wulfridge, et al<sup>85</sup>, in *Tasor* KO,  
495 PB, WT naïve mouse ESC (2i/L) and EpiLCs (FA), depicting the position effect varigenation of L1s  
496 affecting nearby gene expression upon TASOR loss. **(H)** RT-qPCR mRNA fold change between *Tasor*  
497 KO, PB, WT naïve mouse ESC (2i/L) for *Mrc1* N terminus. **(I)** RT-qPCR mRNA fold change between  
498 *Tasor* KO, PB, WT naïve mouse ESC (2i/L) for *Mrc1* C terminus. **(J)** Upregulated DEG genes nearest  
499 Line 1 distance in 2i/L.

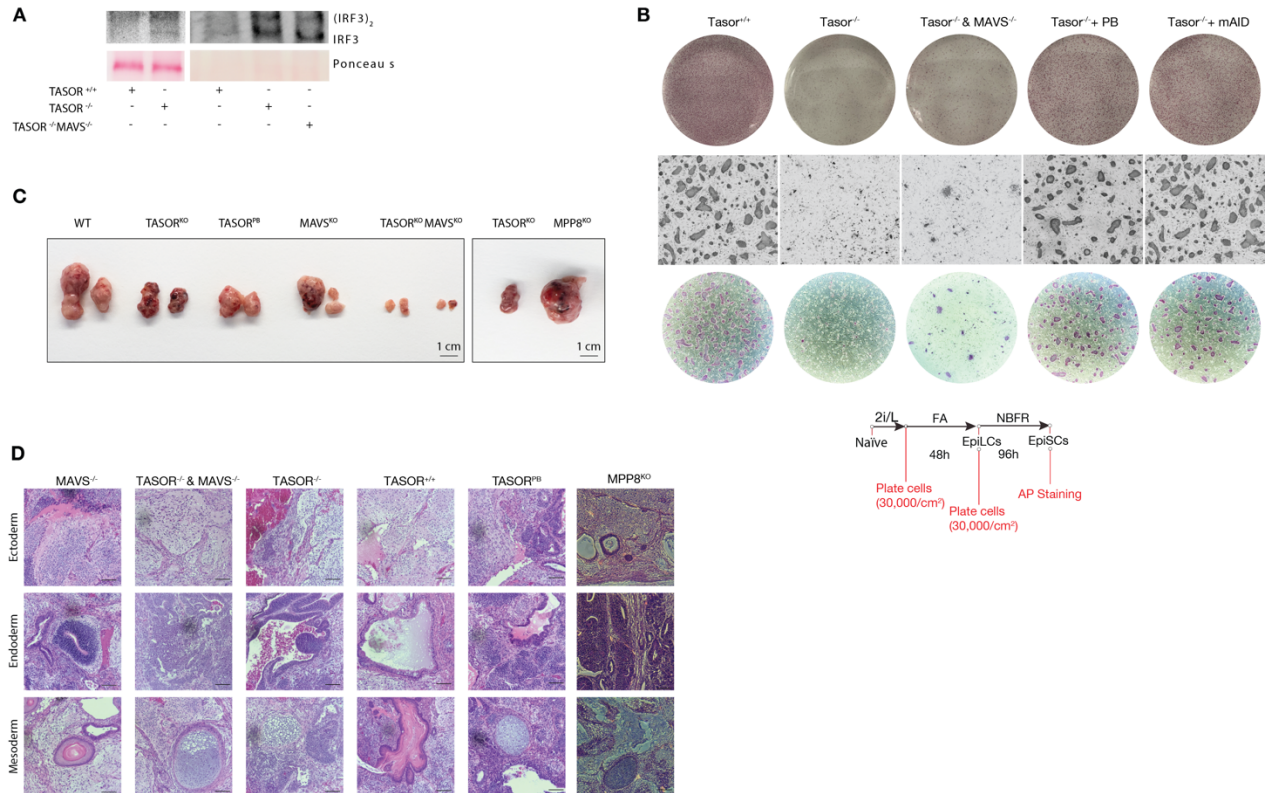

500 **Supplementary Figure 9. Characterization of MAVS and TASOR double Knockout cells.**

501 (A) Western blot of native PAGE gel for IRF3 dimerization in *Tasor* KO, WT or *Tasor* and MAVS double KO.  
 502 (B) Alkaline phosphatase of colony formation assay for *Tasor* WT, KO, *Tasor* and MAVS double KO, PB,  
 503 and KO recued with TASOR-mAID-TAP naïve ESCs transitioned to EpiSCs. (C) Teratomas of *Tasor* WT,  
 504 KO, PB, MAVS KO, *Tasor* and MAVS double KO, and MPP8 KO naïve ESCs. (D) Brightfield  
 505 histopathological slides stained with hematoxylin and eosin (H&E) of teratomas. Scale bar: 100µm.

## 506 **METHODS**

### 507 **Culture of mouse embryonic stem cells (ESC)**

508 All cell cultures were performed in N2B27 basal media. This media was prepared using the  
509 following (250ml): 125 ml DMEM/F12 (Invitrogen), 125 ml neurobasal medium (Invitrogen), 1x N2  
510 supplement (5ml, Invitrogen), 1x B27 supplement (10ml, Invitrogen), 1x GlutaMAX (2.5ml, Gibco), 1x  
511 nonessential amino acids (2.5ml, Gibco), 0.1 mM  $\beta$ -mercaptoethanol (Gibco), 1% fatty acid free BSA, and  
512 2.5 $\mu$ g/ml of prophylactic plasmocin (InvivoGen) to prevent mycoplasma contamination during  
513 maintenance of the cells but was removed before any experimental assay (InvivoGen) .

514 All cell culture was performed as following: cells were washed with 1xPBS and dissociated with  
515 TrypLE (Thermo Fisher) for 3 minutes at 37°C; cells were then collected with 0.05% BSA in DMEM-F12  
516 (Thermo Fisher) and centrifuged at 1000xg for 3 minutes and resuspended in 1ml of media per 9.6cm<sup>2</sup>.  
517 Each passage cells were counted using Countess II (Thermo Fisher) and plated at a density of 15,000  
518 cells/cm<sup>2</sup>, at this plating ratio cells were passaged every 4 days. Fresh media (2ml per 9.6 cm<sup>2</sup>) was added  
519 during the first two days, and on days 3 and 4 the media amount was doubled. Cell cultures were  
520 maintained in a 37°C humidified in incubator with 5% CO<sub>2</sub>. Cells were cryopreserved in CryoStor CS10  
521 (Biolife solutions) at 0.5x10<sup>6</sup> cells per ml in -80°C, using in CoolCell freezing containers (Corning). The  
522 following day, cells were moved for long term storage in liquid nitrogen.

523 Naïve mouse ESCs (naïve ESCs) were cultured feeder free, on Geltrex (Gibco) coated cell culture  
524 dishes in 2i/L media. 2i/L media was prepared in N2B27 basal media with the addition of the following  
525 small molecules and cytokines: 1  $\mu$ M PD0325901 (MEK 1/2 inhibitor, Selleckchem), 3 $\mu$ M CHIR 99021  
526 (WNT agonist via GSK3  $\alpha/\beta$  inhibitor, Selleckchem) and in the presence of the STAT3 agonist, leukemia  
527 inhibitory factor (LIF, 10ng/ml).

528

### 529 **Culture of epiblast like stem cells (EpiLCs), epiblast stem cells (EpiSCs), and colony clonogenicity** 530 **formation assays.**

531 Mouse epiblast like stem cells (EpiLCs), were transitioned from 2i/L cultures by plating the cells on  
532 Geltrex (Gibco) coated cell culture dishes at a density of 15,000 cells/cm<sup>2</sup> in N2B27 based FA media  
533 containing 12ng/ml of FGF2 and 20ng/ml of Activin A for 48 hours. Media was replaced every 24 hours.  
534 Mouse epiblast stem cells (EpiSCs) were transitioned from EpiLCs by plating the cells on mitotically  
535 inactivated mouse embryonic fibroblast (MEF) on 0.1% gelatin coated cell culture dishes at a density of  
536 15,000 cells/cm<sup>2</sup> in N2B27-based NBFR media containing 20ng/ml of FGF2 and 2.5 $\mu$ M of the WNT  
537 antagonist IWR1 (Selleckchem). Media was replaced every 24 hours. For colony clonogenicity assays,  
538 cells were plated at 500-5000 cells/cm<sup>2</sup>. Once colonies had grown (6-15 days), cells were stained with an  
539 alkaline phosphatase staining kit following manufactures instructions (Abcam), or with coomassie brilliant  
540 blue (Thermo)

541

## 542 **Culturing of human naïve PSCs**

543 Naïve WIBR3 human ES cells were obtained from R. Jaenisch and T. Theunissen. Primed human  
544 PSC were cultured in MEFs on 0.1% gelatin-coated cell culture dishes on N2B27 based media as  
545 described above. Primed cells were cultured on irradiated mouse embryonic fibroblasts in NBFR (Table 1)  
546 supplemented with 20ng/ml of LIF and 20ng/ml of Activin A. Primed cell lines were reset to the naïve state  
547 following a previously described protocol<sup>4108</sup>. Briefly, 20,000 cells/cm<sup>2</sup> primed cells were treated with 1µM  
548 PD0325901(Selleckchem), 1mM Valporic acid (VPA, Medchemexpress), 20ng/ml of leukemia inhibitory  
549 factor (LIF, Peprotech) and CEPT cocktail [50 nM Chroman 1 (MedChem Express), 5 µM Emericasan  
550 (Selleckchem), 1X polyamine supplement (Sigma), and 0.7 µM TransISRIB (Tocris)], for 3 days. Then,  
551 media was changed to a modified 5i/L/A medium.

552 All naïve human ESCs were cultured on Geltrex-coated dishes. Briefly, 25,000 cells/cm<sup>2</sup> naïve  
553 PSCs were plated into Geltrex-coated cell culture plates in the modified 5i/L/A medium<sup>108</sup>. The cells were  
554 passaged as described above with 1xCEPT cocktail<sup>109</sup> [50 nM Chroman 1 (MedChem Express), 5 µM  
555 Emericasan (Selleckchem), 1X polyamine supplement (Sigma), and 0.7 µM TransISRIB (Tocris)], for 12  
556 hours. The modified 5i/L/A medium was prepared using N2B27 basal media with the addition of 0.5%  
557 KSR, 50 µg/ml of bovine serum albumin (BSA, Sigma) and the following small molecules and cytokines: 1  
558 µM PD0325901 (Selleckchem), 0.5 µM IM-12 (Enzo), 0.5 µM SB590885 (R&D systems), 1 µM WH-4-023  
559 (Selleckchem), 20 ng ml<sup>-1</sup> recombinant human LIF (Peprotech), 10 ng ml<sup>-1</sup> Activin A (Peprotech) and 5  
560 µM Y-27632 (Selleckchem), 2µM XAV939 (MedChem Express) and 2µM Gö 6983 (MedChem Express).  
561 Naïve ESCs were cultured for a minimum of 10 days in the modified 5i/L/A before any experiment. Naïve  
562 human ESCs were never exposed to serum.

563

## 564 **Generation of blastoids from human naïve PSCs**

565 Blastoid generation was performed as described by Yu; et al<sup>108</sup>. 5iLA naïve human PSCs were  
566 dissociated into single cells by incubation with TrypLE (Thermo Fisher) for 3-5 min at 37°C. Cells were  
567 collected with 0.1% BSA in DMEM-F12 medium and centrifugated at 1000 rpm (approx. 200xg) for 3 min  
568 in a swing bucket centrifuge (Legend RT+, Thermo Fisher) and recovered in 5iLA medium with 1xCEPT  
569 and 10U/ml of DNase I (Thermo Fisher) and incubated at room temperature for 15min. Cells were then  
570 passed through a 20-µm cell strainer (Pluriselect). To select for viable cells and exclude dead cells and  
571 cell debris, cells were carefully layered on top of 10ml of 0.1% BSA DMEM-F12 in a 45° angle in a 15ml  
572 conical centrifuge tube and centrifuged at 300 rpm for 10 minutes. Supernatant was removed and pelleted  
573 cells were re-suspended and manually counted in a Neubauer counting chamber. Meanwhile, AggreWell-  
574 400 (STEMCELL Technologies) plate was prepared according to the manufacturer's instructions. In brief,  
575 500µl of anti-adherence solution (STEMCELL Technologies) was added to each well, the plate was  
576 centrifuged at 1500 x g for 5 min, and then incubated at room temperature for a minimum of 45 min. The  
577 corresponding number of cells (32 cells / microwell) were washed and resuspended in 1ml eHDM(3µM

578 Chir99021, 10ng/ml FGF2-3G, 20ng/ml Activin A) with 1xCETP and seeded into one well of a precoated  
579 AggreWell-400 24-well plate in 1ml of media. Each well was carefully mixed using a P200 pipette and the  
580 plate was left alone for 15 minutes to ensure equal distribution of the cells inside the well. The plate was  
581 centrifuged at 1000 x g for 3 min and cultured at 37°C in 5% CO<sub>2</sub> and 5% O<sub>2</sub>. The day of cell plating was  
582 designated as day 0. eHDM was completely changed to eTDM on day 1 by carefully removing as much  
583 eHDM as possible without disturbing the aggregates by tilting the plate in a 45° angle, each well was  
584 washed once with 200µl of eTDM, finally 1 ml of eTDM was slowly added 200µl at a time. On the remaining  
585 days, fresh eTDM with fresh LPA was half changed every day. The human blastoids usually formed after  
586 four days of culture in eTDM. All blastoids were manually isolated using a mouth pipette under a  
587 stereomicroscope for downstream experiments. For eHDM and eTDM recipe see Table 1.

588

### 589 **Immunofluorescent staining**

590 Samples (cells, and blastoids) were fixed with 4% paraformaldehyde (PFA) in 1xDPBS with 0.1%  
591 PVA for 20 min at room temperature, washed in wash buffer (0.1% Triton X-100, 5% BSA in 1xDPBS) for  
592 15 minutes and permeabilized with 0.1-1% Triton X-100 in PBS for 1 h. For 5mC / 5hmC staining samples  
593 were treated with 4N HCL for 15 minutes, and then neutralized with 100mM Tris-HCL pH 8.0 for 30  
594 minutes. Samples were washed 3 times in wash buffer for 5 minutes and then blocked with blocking buffer  
595 (PBS containing 5% Donkey serum, 5% BSA, and 0.1% Triton X-100) at room temperature for 1 h, or  
596 overnight at 4°C.

597 Primary antibodies were diluted in blocking buffer (Table 2). Blastoids were incubated in primary  
598 antibodies in U bottom 96 well plate for 2 h at room temperature or overnight at 4°C. Samples were washed  
599 three times for 15 minutes with wash buffer, and incubated with fluorescent -dye-conjugated secondary  
600 antibodies (AF-488, AF-555 or AF-647, Invitrogen) diluted in blocking buffer (1:300 dilution) for 2hr at room  
601 temperature or overnight at 4°C. Samples were washed three times with wash buffer. Finally, cells were  
602 counterstained with 300 nM 4',6-diamidino-2-phenylindole (DAPI) solution at room temperature for 20  
603 min.

604

### 605 **Imaging**

606 Phase contrast images were taken using a hybrid microscope (Echo Laboratories, CA) equipped  
607 with objective x2/0.06 numerical aperture (NA) air, x4/0.13 NA air, x10/0.7 NA air and 20x/0.05 NA air.  
608 Fluorescence imaging was performed on 8 or 96 well µ-siles (Ibidi) on a Nikon CSU-W1 spinning-disk  
609 super-resolution by optical pixel reassignment (SoRa) confocal microscope with objectives x4/0.13 NA, a  
610 working distance (WD) of 17.1nm, air; x20/0.45 NA, WD 8.9–6.9 nm, air; x40/0.6 NA, WD 3.6–2.85 nm, air.

611

### 612 **Imaging analysis**



613 All Imaging experiments were repeated at least twice, with consistent results. In the figure  
614 captions, n denotes the number of biological repeats. Raw images were first processed in Fiji<sup>110</sup> to create  
615 maximal intensity projection (MIP) and an export of representative images. Nuclear localized fluorescence  
616 intensity was computed for each cell in each field, and the value was then normalized to the DAPI intensity  
617 of the same cell. Intensity values of all cells were plotted as channel intensity over DAPI intensity for the  
618 same cell with mean  $\pm$  s.d. GATA6 positive cells were selected and separated from negative cells using  
619 the spot colocalization tool. Epiblast cells were calculated as GATA6 negative spots. Trophectoderm and  
620 hypoblast cells as GATA6 positive spots.

621

### 622 **Western blotting.**

623 A minimum of  $1 \times 10^6$  cells were harvested by centrifugation and lysed in RIPA lysis buffer (150mM  
624 NaCl, 1% Nonidet P-40, 0.5% Sodium deoxycholate (DOC), 0.1% SDS, 50mM Tris-HCL) supplemented  
625 with 1mM PMSF, 2mM  $MgCl_2$ , 1x Halt complete protease inhibitor cocktail (Thermo Fisher Scientific) and  
626 1x Halt phosphatase inhibitor cocktail (Thermo Fisher Scientific). Cell lysates were incubated with 10 $\mu$ l of  
627 benzonase (Sigma) per 100 $\mu$ l of RIPA buffer, for 15minutes at room temperature. Lysates were quantified  
628 using PIERCE BCA protein assay kit (Thermo Fisher Scientific) as per manufacturer instructions and  
629 absorbance was measured at 562nm using a SpectraMax iD3 plate reader (Molecular Devices). Protein  
630 concentrations were normalized to the lowest sample. Samples were denatured with Laemmli buffer  
631 (0.05M Tris-HCl at pH 6.8, 1% SDS, 10% glycerol, 0.1%  $\beta$ -mercaptoethanol) by boiling for 10 minutes.  
632 30 $\mu$ g of total protein were resolved using SDS-PAGE followed by transfer to PVDF membranes. Transfer  
633 was visualized using Ponceau S staining solution (0.5 % w/v Ponceau S, 1% acetic acid). Membranes  
634 were cut and washed with TBS with 0.1% Tween (TBS-T) and blocking for 1 h with 5% MILK (BSA for  
635 phosphorylation specific antibodies) in TBS-T. Membranes were then incubated with the corresponding  
636 primary antibodies (Table 2). Immunoreactive bands were visualized using HRP conjugated secondary  
637 antibodies (Table 2), and incubated with chemiluminescence substrate (Pierce ECL western substrate,  
638 Thermo Fisher Scientific) and exposed to X-ray film or a ChemiDoc imaging system (BioRad).

639

### 640 **Teratoma tumor formation assay**

641 Mouse ESCs were suspended in a 1:1 mixture of Matrigel and DMEM/F12 medium at a  
642 concentration of  $1 \times 10^7$  cells/mL. 100  $\mu$ L of each cell mixture ( $1 \times 10^6$  cells per tumor) was injected  
643 subcutaneously into the flanks of immunodeficient NOD/SCID mice. After 4 weeks, tumors were dissected,  
644 weighed, and fixed in 4% paraformaldehyde for 48 hours. Fixed tumor samples were submitted to the UT  
645 Southwestern Histopathology Core Facility for paraffin embedding and sectioning. Embedded and  
646 sectioned teratomas were stained with hematoxylin and eosin for tissue identification.

647

### 648 **Cell cycle analysis and Flow cytometry.**

649            Approximately  $1 \times 10^6$  cells were treated with 10  $\mu$ M EdU for 20 minutes at 37°C. Cells were  
650 harvested and fixed in ice-cold 96% methanol cells were permeabilized for 15 minutes using saponin and  
651 stained using the Click-iT Edu Alexa Fluor 488 flow cytometry assay kit (Thermo) as per manufacturing  
652 instructions, with DNA was counter staining with FxCycle Far Red with addition of RNase (Thermo). Flow  
653 cytometry was performed using the appropriate unstained and single stain controls in a DBiosciences LSR  
654 II flow cytometer and analyzed using Flow Jo. Gating Strategy to determine cell cycle stages is shown in  
655 Figure S1G.

656

### 657 **IRF3 Dimerization assay**

658            Cell pellets were resuspended in a modified RIPA buffer (50mM Tris Ph 8.0, 150mM NaCl, 1%  
659 NP40, 5% glycerol, 10mM sodium Fluoride, 0.4mM ETA, 1mM PMSF, 1xProtease inhibitor cocktail,  
660 1xPhosphatase inhibitor cocktail), incubated on ICE for 30 min and centrifuge at 13,000xg for 10 min.  
661 Supernatant protein was quantified using the Pierce BCA quantification kit using a 1:2 dilution and  
662 absorbance at 563nm was detected in a spectrophotometer. Protein was flash frozen in liquid nitrogen  
663 and stored at -80°C. A 1.5mm non-denaturing 6% acrylamide/bis-acrylamide (29:1) gel without SDS at  
664 4°C with the inner chamber buffer containing 25mM Tris-HCL pH 8.4, 192mM glycine and 1% deoxycholic  
665 acid in dH2O and the outer chamber containing 25mM Tris-HCl pH 8.4 and 192mM Glycine in dH2O was  
666 pre ran for 30 min on ice at constant 40 mA. 50 $\mu$ g of total protein was mixed with 2x loading dye (125mM  
667 Tris-HCL 6.8, 30% glycerol 0.1% Bromophenol blue in dH2O) and ran at 40mA until the migration of the  
668 bromophenol blue exited the gel. The gel was washed for 15 minutes in 1x SDS-PAGE running buffer and  
669 transferred on ice to a PDVF membrane in 1x transfer buffer with 5% methanol at 375mA for 2 hours.

670

### 671 **5-mC DOT blot assay**

672            Dot blot analysis was made as described in Blaschke, et al<sup>4</sup> with modifications, samples genomic  
673 DNA was purified from  $1 \times 10^6$  cells using the DNeasy blood & tissue Kit (Quiagen). DNA was eluted in  
674 10mM Tris HCl pH 8 and quantified using a spectrophotometer. 2 $\mu$ g of DNA samples were denatured in  
675 0.4M NaOH, 10mM EDTA at 100°C for 10 minutes, and neutralized by adding an equal volume of ice cold  
676 2M ammonium acetate pH 7.0 and, and then serially diluted twofold. Nitrocellulose membranes were pre  
677 wetted in 6xSSC, diluted DNA samples were spotted on a nitrocellulose membrane using a Bio-Dot  
678 microfiltration apparatus (Bio-Rad). The blotted membrane was washed in 2x SSC buffer, dried at 80°C  
679 for 5min, and UV cross-linked at 120,000 $\mu$ J/cm<sup>2</sup>. The membrane was then blocked in 5% milk in TBS-T  
680 for 1h at room temperature. Mouse anti-5-methylcytosine monoclonal antibody (Active Motif, 1:500) was  
681 added for 2h at room temperature. The membrane was washed for 10min three times in TBS-T, and then  
682 incubated with HRP-conjugated goat anti-mouse immunoglobulin-G (IgG) (Thermo, 1:10,000) for 1h at  
683 room temperature. The membrane was then washed for 10min three times in TBS-T and visualized with

684 chemiluminescence substrate (Pierce ECL western substrate, Thermo Fisher Scientific) and a ChemiDoc  
685 imaging system (BioRad).

686

### 687 **Methylated DNA Immunoprecipitation and qPCR (meDIP qPCR)**

688 Methylated DNA Immunoprecipitation was performed as described by Karpova, et al<sup>111</sup>, with  
689 modifications. Genomic DNA was purified from  $1 \times 10^6$  cells using the DNeasy blood & tissue Kit (Quiagen).  
690 Purified Genomic DNA was diluted to 100ng/ $\mu$ l in TE (10mM Tris, 1mM EDTA), 2.5 $\mu$ g in 62.5 $\mu$ l were  
691 sonicated for 6 cycles of 30 seconds on / 90 seconds off in 1.5ml tubes for 8 cycles at 4°C in a Bioruptor  
692 pico (sonication device (Diagenade). Sonication size was confirmed via gel electrophoresis. DNA was  
693 denatured at 100°C for 10 minutes and quickly submerged in an ice water bath for 5 minutes.  
694 Immunoprecipitation was performed in 1x IP buffer (10mM sodium phosphate buffer pH 7.0, 1400mM  
695 NaCl, and 0.1% Triton X-100) with 1 $\mu$ g of antibody (Mouse anti 5mC, Active Motif, 39649 / Mouse IgG)  
696 per 1 $\mu$ g of DNA in a 100 $\mu$ l volume, at 4 °C overnight in a mixing platform. The following day 20 $\mu$ l of  
697 prewashed protein magnetic beads were added to each reaction, mixed and incubated at 4°C with  
698 overhead shaking. Beads were placed in a magnetic rack and washed x4 times with 200 $\mu$ l of 1x IP buffer  
699 and resuspended in 50 $\mu$ l of Proteinase K digestion buffer (50mM Tris-HCl pH 8.0, 10mM EDTA pH8.0 AND  
700 0.1% SDS with 10 $\mu$ g/ml of proteinase K for 1h at 56°C with overhead shaking in a hybridization oven (UVP,  
701 Hybrilinker HL-2000). Beads were collected with a magnetic rack and supernatant was transferred to clean  
702 PCR tubes. DNA was the purified with AMPure XP beads (Beckam), briefly beads were mixed using a 1:1  
703 ratio and incubated for 2 minutes and washed with 70% ethanol before eluting with 100 $\mu$ l of 10mM Tris-  
704 HCl pH 8.0. 8% of input was diluted 10 times and 2 $\mu$ l (4ng) were used for each qPCR reaction.

705

### 706 **Cloning of TASOR by overlapping PCR**

707 TASOR was amplified by overlapping PCR, three primer sets were designed with overlapping  
708 sections, 100ng of Genomic DNA was used per PCR reaction with primeSTAR GXL DNA polymerase  
709 (Takara Bio) using a touchdown PCR for the first 10 cycles from 72 to 60 followed by 35-40 cycles at the  
710 proper annealing temperature ( $T_m - 2^\circ\text{C}$ ) and extension 68°C 30sec/Kb or 72°C 15sec/Kb and purified  
711 using a PCR purification KIT (Qiagen). Equimolar amounts of PCR products were mixed and a PCR was  
712 made with a primeSTAR GXL DNA polymerase (Takara Bio) without primers for the first 10 cycles using  
713 the following thermocycler conditions (95°C 3min, 98°C 10s, 60°C 30s, 68°C 5min, go to 2 15x, followed  
714 by the addition of the forward and reverse primers (0.5 $\mu$ M ea) and the reaction continued as a normal PCR  
715 for the next 20 cycles. Reaction products were gel purified and cloned into the expression vector via  
716 Gibson assembly. Vectors were sequenced using nanopore sequencing sanger sequencing at repetitive  
717 sites (Eurofins genomics).

718

## 719 **Auxin induced degradation of TASOR.**

720 Auxin-inducible degradation of TASOR was made using the auxin inducible degron 2 technology  
721 <sup>35</sup>. For this mouse TASOR was cloned via Gibson assembly into a custom vector, expressing puromycin  
722 selection under a cytomegalovirus (CMV) enhancer fused to the chicken beta-actin promoter (CAG)  
723 promoter, a T2A sequence and TASOR with a C-terminal mini auxin-inducible degron (mAID) and a strep-  
724 strep-3xFlag tandem affinity purification (TAP). *Oryza sativa* TIR1 (OsTIR1) F74G was cloned downstream  
725 of the blasticidin resistance gene driven by a CAG promoter using a T2A sequence. Vectors were  
726 sequenced using nanopore sequencing Sanger sequencing at repetitive sites (Eurofins genomics). Cell  
727 lines were generated in a sequential manner via random integration and antibiotic selection with 5µg/ml of  
728 blasticidin and 1µg/ml of puromycin. Expression of TASOR and OsTIR1 was confirmed via qPCR and Flag  
729 immunofluorescence. Degradation was induced via the addition of 2µM 5ph-IAA, fresh media with 5ph-  
730 IAA was replaced every 12 hours. For mRNA half-live experiments, transcriptional inhibition was made  
731 with 5µg/ml of Actinomycin D

732

## 733 **Statistical analysis**

734 All experiments were performed using two or more independent biological replicates. For cell  
735 cycle, q-PCR, imaging analysis and cell death assays, after verifying for the assumptions of equal variance  
736 and normality, P values were calculated using One-Way ANOVA with Tukey's HSD. Unless otherwise  
737 indicated, error bars represent standard deviation. Analyses were performed with Prism (Graphpad).

738

## 739 **Visualization of RNA-seq and CUT&Tag data**

740 The transcriptome and ChIP-seq datasets were visualized using Integrative Genomics Viewer  
741 (IGV, version 2.3.88 <sup>112</sup>). Heatmaps and volcano plots were generated using R Statistical Software and the  
742 following R packages ggplot2, DESeq2m heatmap3, RcolorBrewer.

743

## 744 **CRISPR-Cas9 mediated gene knockout**

745 CRISPR-Cas9 sgRNAs<sup>25</sup> were design as previously described<sup>113</sup>, briefly all DNA sequences were  
746 manipulated using Benchling, sgRNAs were designed using Benchling with guide cleavage efficiency  
747 made with the WU-CRISPR tool<sup>114</sup>. Guides with minimal off targets and high cleavage efficiency were  
748 chosen. Each guide and its complementary sequence were ordered as synthetic 25nm oligos from  
749 (Thermo Fisher) with attached BbsI cloning sites: Sense: 5'-CACCGNNNNNNNNNNNNNNNNNNNN-3' and  
750 antisense: 3'-CNNNNNNNNNNNNNNNNNNNNNCAAA-5. Guides were cloned via golden gate assembly as  
751 described in Konnermann, S. et al<sup>115</sup>, with modifications. Briefly, 100pmol of each complementary oligo  
752 were phosphorylated using T4 PNK with T4 ligase buffer (contains ATP) for 30 minutes at 37°C, then oligos  
753 were annealed by denaturing at 95°C for 5 minutes and then slowly cooled down using a ramp of 5°C per  
754 minute up to 25°C. Phosphorylated and annealed oligos were diluted 1:10 and a Golden Gate reaction

755 was setup with 1x rapid ligase (Roche), 10 units of BbsI enzyme, T7 DNA ligase (Roche) 25ng of backbone  
756 vector, reaction was run for 15 cycles of digestion at 37°C for 5 minutes and ligation at 20°C for 5 minutes.  
757 2 µl of the golden gate reaction were transform into competent cells. After confirmation via sanger  
758 sequencing, maxipreps of sgRNAs were made with the Purelink HiPure plasmid maxiprep kit (Thermo) and  
759 DNA was eluted in 10mM Tris-HCl at a concentration of 2µg/µl. Cells were transfected using a NEPA21  
760 electroporator (Nepa Gene) using 4 µg of total DNA per 1x10<sup>6</sup> cells. Conditions. Four “poring pulses”  
761 were applied (150 V, 3.0 ms, interval 50 ms, 10% voltage decay, polarity+), followed by 5 “transfer pulses”  
762 (5 V, 50 ms, interval 50 ms, 40% voltage decay; alternating + and – polarity). Cells were rapidly placed in  
763 pre warmed culture media to recover. Cells were FACS sorted 24 to 72h after transfection, the top 20%  
764 of selection marker positive cells was sorted and collected. Cells were plated at a density of 1000 cells  
765 per 9.6cm<sup>2</sup>. Single cell colonies were marked with an object maker (Nikon) and manually picked under a  
766 microscope in a laminar flow hood. 50 percent of recovered cells was lysed in 50µl of Quickextract DNA  
767 extraction solution (Biosearch) and genotyped via PCR. Positive clones were expanded and PCR again to  
768 ensure no integration of the CAS9 backbone.

769

#### 770 **Mitotic Errors.**

771 Images were captured on a DeltaVision Ultra (Cytiva) microscope system equipped with a 4.2Mpx  
772 sCMOS detector. Fibers were acquired with a x100 objective (UPlanSApo, 1.4 NA) and 10×0.2µm z-  
773 section.

774

#### 775 **DNA Fiber assay and analysis**

776 To evaluate replication forks via DNA fibers<sup>116</sup>, exponentially growing cells were pulse-labeled for  
777 20 minutes with 25 µM 5-iodo-2-deoxyuridine (I7125, Sigma-Aldrich), followed by a second 20-minute  
778 pulse with 250 µM 5-chloro-2-deoxyuridine (C6891, Sigma-Aldrich). The labeled cells were then washed  
779 twice with ice-cold 1X PBS, collected, and suspended at a concentration of 30,000 cells/ml. Subsequently,  
780 30 µl of the suspension was centrifuged onto slides for 4 minutes at 800 rpm. After cytopinning, the slides  
781 were immersed in Lysis Buffer (0.5% SDS, 200mM Tris-HCl, 50mM EDTA) for 5 minutes, and DNA  
782 molecules were stretched using a homemade LEGO device. DNA fiber spreads were fixed in ice-cold  
783 Carnoy fixative for 10 minutes at room temperature and air-dried. Slides were rehydrated twice in water  
784 and incubated for 1 hour at room temperature in 2.5 M HCl. Afterward, the slides were rinsed twice in 1X  
785 PBS and blocked for 1 hour at room temperature in a blocking solution (1X PBS + 1% BSA + 0.5% Triton  
786 X-100 + 0.02% NaN<sub>3</sub>). The slides were then incubated in primary antibodies overnight at 4°C. The  
787 following primary antibodies were used at the indicated dilutions: 1:100 anti-BrdU (BDB347580, Becton  
788 Dickson) and 1:250 anti-CldU (ab6326, Abcam). The slides were then rinsed three times in 1X PBS and  
789 fixed in 4% paraformaldehyde in PBS for 10 minutes at room temperature. Afterward, they were rinsed  
790 twice in 1X PBS and incubated with 1:1,000 dilutions of Alexa Fluor-conjugated donkey anti-mouse or

791 donkey anti-rat secondary antibodies (Invitrogen) for 2 hours at room temperature. Finally, the slides were  
792 washed twice in 1X PBS and mounted in ProLong Gold antifade mounting solution. Immunofluorescence  
793 images were captured on a DeltaVision Ultra (Cytiva) microscope system equipped with a 4.2Mpx sCMOS  
794 detector. Fibers were acquired with a x60 objective (PlanApo N 1.42 oil) and 1×0.2µm z-section.  
795 Quantitative image analyses were performed using Fiji (v.2.1.0/1.53c). locking Buffer.

796

## 797 **RNA Seq**

798 RNA extraction was performed using a RNeasy Mini Kit (QIAGEN) using DNase treatment  
799 (QIAGEN). RNA was analyzed using a 2100 Bioanalyzer (Agilent Technologies). Libraries with unique  
800 adaptor barcodes were multiplexed and sequenced on an NovaSeq 6000 (paired-end, 150 base pair  
801 reads). Typical sequencing depth was at least 50 million reads per sample.

802

## 803 **RNA Seq analysis**

804 Quality of datasets was assessed using the FastQC tool. Raw reads were adapter and quality  
805 trimmed using Trimalore<sup>117</sup>. Reads were aligned to the mouse genome (mm10) with STAR<sup>118</sup>, using a  
806 custom GTF file which contained the NCBI RefSeq genes plus the addition of DFAM's non-redundant  
807 repetitive element annotations<sup>119</sup>. Optical duplicate reads were filtered using Picard  
808 (<http://broadinstitute.github.io/picard/>). Samtools was used to filter out alignments with MAPQ < 30.  
809 Count matrices were generated using the featureCounts tool<sup>120</sup>. DESeq2 was used for the generation of  
810 normalized counts, log2FoldChange, and adjusted *p*-values<sup>121</sup>. baseMean was calculated as the mean of  
811 the normalized counts for samples present within a pairwise comparison. MA plots were generated using  
812 R and ggplot2<sup>122</sup>.

813

## 814 **CUT&Tag**

815 CUT&Tag was performed as previously described<sup>60</sup> with modifications. Briefly, 3×10<sup>6</sup> cells were  
816 harvested and resuspended in ice-cold nuclei extraction buffer (20mM HEPES KOH pH 7.9, 10mM KCl,  
817 1% Triton X-100, 0.5 mM spermidine, EDTA free protease inhibitor cocktail (Roche)) at left on ice for 10  
818 minutes. Nuclei were pelleted in a swinging bucket rotor at 1,300xg for 3 minutes, washed once with PBS  
819 and resuspended and cryopreserved in wash buffer 150 (20 mM HEPES pH 7.5, 150 mM NaCl, protease  
820 inhibitor cocktail (Roche), 0.5 mM Spermidine) with 10% DMSO, cryovials were placed in -80°C, using in  
821 CoolCell freezing containers (Corning) and then stored in liquid nitrogen until experiment. Nuclei were  
822 bound to CUTANA Concanavalin A Beads (Epiccypher) for 15 min, then incubated with 50 µL Wash125 +  
823 0.1% BSA, 2 mM EDTA, and 1 µL primary antibody targeting either H3K9me3 (Abcam, ab8898) or Flag  
824 (Cell Signalling, 2368T) overnight at 4°C. Nuclei were resuspended in 100 µL Wash125 + 1 µL secondary  
825 antibody at room temperature for 1 h. Nuclei were washed twice in 1 mL Wash125 (with no Spermidine),  
826 then resuspended in 200 µL Wash125 - Spermidine and + 0.2% formaldehyde for 2 min and then

827 quenched with 50  $\mu$ L 2.5 M glycine. Nuclei were washed once in 1 mL Wash350 (20 mM HEPES pH 7.5,  
828 350 mM NaCl, 10 mM NaButyrate, 0.025% Digitonin, protease inhibitor cocktail (Roche), 0.5 mM Sper-  
829 midine) then incubated in 47.5  $\mu$ L Wash350 + 2.5  $\mu$ L pAG-Tn5 (Epicyper 15-1017) for 1 h. Nuclei were  
830 washed twice in 1 mL Wash350, then resuspended in 300  $\mu$ L Wash350 + 10 mM MgCl<sub>2</sub> and incubated  
831 for 1 h at 37°C. Tn5 reaction was stopped with 10  $\mu$ L 0.5 M EDTA, 3  $\mu$ L 10% SDS, and 3  $\mu$ L 18 mg/mL  
832 Proteinase K, briefly vortexed, then incubated at 55°C for 2 h to reverse crosslinks and release fragments.  
833 The fragments were then purified with phenol-chloroform and resuspended in 22  $\mu$ L 1 mM Tris-HCl pH 8,  
834 0.1 mM EDTA. The entire sample was amplified with Nextera i5 and i7 primers according to the Illumina  
835 protocol. The quality of the libraries was assessed using a D1000 ScreenTape on a 2200 TapeStation  
836 (Agilent) and quantified using a Qubit dsDNA HS Assay Kit (Thermo Fisher). Libraries with unique adaptor  
837 barcodes were multiplexed and sequenced on an NovaSeq 6000 (paired-end, 150 base pair reads).  
838 Typical sequencing depth was at least 50 million reads per sample.

839

#### 840 **CUT&Tag analysis**

841 Quality of datasets was assessed using the FastQC tool. Raw reads were adapter and quality trimmed  
842 using Trimgalore<sup>117</sup>. Trimmed reads were aligned to the mouse reference genome (mm10) with Bowtie2<sup>123</sup>  
843 bowtie2 -q -R 3 -N 1 -L 20 -i S,1,0.50 --end-to-end --dovetail --no-mixed -X 2000). Multimapping reads  
844 were randomly assigned. Optical duplicate reads were filtered using Picard. Reads which mapped to the  
845 mitochondrial genome were removed with Samtools<sup>124</sup> (samtools idxstats \$sample.sorted.bam | cut -f 1 |  
846 grep -v chrM | xargs samtools view -b \$sample.sorted.bam). Peak calling was performed with MACS2  
847 software<sup>125</sup> (--keep-dup all --nomodel -B -f BAMPE, --broad peakcalling was used for H3K9me3, whereas  
848 default narrow peaks were called for TASOR-FLAG and ) and an FDR cutoff of 0.001 was applied to  
849 generate peak bedfiles. Peaks which intersected blacklisted high-signal genomic regions were removed.  
850 BigWig files were generated from merged bam files using deepTools<sup>126</sup> and normalized to counts per  
851 million (CPM). Visualization of bigWigs was done in Integrative Genomics Viewer<sup>112</sup>. Intersections between  
852 different peak sets were made using BEDTools<sup>112</sup>. Browser-style heatmaps and average profiles were  
853 generated using deepTools. Clustered heatmaps (ie Figure 3D) were generated using R and pheatmap<sup>127</sup>  
854 .

855

#### 856 **ATAC-seq**

857 The modified ATAC-sequencing protocol, Omni-ATAC was performed as previously described<sup>128</sup>.  
858 Briefly, 10<sup>5</sup> cells were lysed with resuspension buffer (Tris 10 mM, pH 7.4, 10 mM NaCl, 3 mM MgCl<sub>2</sub>,  
859 0.1% NP-40, 0.1% Tween-20, and 0.01% Digitonin) and nuclei were collected for tagmentation at 37 °C  
860 for 30 minutes (Illumina Tagment DNA Enzyme and Buffer Small Kit). The reaction was immediately purified  
861 using Qiaquick PCR Purification Kit (Qiagen) and eluted in 20  $\mu$ l water. Eluted DNA was amplified using  
862 NEBNext Ultra II PCR Master Mix (NEB) and purified using AMPure XP beads. Libraries with unique

863 adaptor barcodes were multiplexed and sequenced on an NovaSeq 6000 (paired-end, 150 base pair  
864 reads). Typical sequencing depth was at least 50 million reads per sample.

865

### 866 **ATAC-Seq Analysis**

867 ATAC-seq data was processed as described above for CUT&Tag.

868

### 869 **TOBIAS analysis**

870 For TOBIAS analysis, replicate bam files were merged using Samtools. TOBIAS ATACorrect and  
871 ScoreBigWig were used to generate scored bigWig files for each merged sample. BINDetect was then  
872 used to generate pairwise differential binding scores between samples for each expressed JASPAR motif.  
873 For analysis of differential binding scores specifically in promoters, BINDetect was restricted using option  
874 --output-peaks to regions of interest, ie specific repetitive element subfamilies using bedfiles generated  
875 from Dfam's dfam's non-redundant hits files (mm10.nrph.hits.gz) or the non-repetitive genome.

876

### 877 **Author Contributions**

878 C.A.P-A, R.O., L.B., and J.W. conceptualized, designed, analyzed, and interpreted the  
879 experimental results. A.M performed mitotic error and DNA fiber analysis. Y.H generated the MAVS TASOR  
880 double knockout lines. E.B, Y.W, M.S, performed teratoma assays and mouse work. A.P performed  
881 experimental procedures and data collection. R.O. performed epigenetic profiling and bioinformatic data  
882 processing. C.A.P-A and D.S performed molecular cloning. P.L., L.B. and J.W. supervised the study.  
883 C.A.P-A., A.P, R.O., L.B. and J.W. wrote the manuscript with inputs from all authors.

884

### 885 **Acknowledgements**

886 We would like to thank the members of the Wu, Banaszynski, Moazed and Tagliabracci for  
887 discussions throughout this project. We would also like to help inputs from Harleen Saini, Vincent  
888 Tagliabracci, Joshua Mendell, Zhijian 'James' Chen and Eric Olson. We want to acknowledge the help  
889 from Krzysztof Pawlowski in the bioinformatic discovery. We would like to acknowledge the help from Dr  
890 Angela Mobley (UT Southwestern Flow cytometry core), Dr. Marcel Mettlen (UT Southwestern Quantitative  
891 Light Microscopy Core Facility) Dr. Andrew Lemoff (UT Southwestern Proteomics Core Facility), and Drs.  
892 Chad Brautigam and Dr. Shih-Chia (Scott) Tso (UT Southwestern Molecular Biophysics Core). L.B. is a  
893 Virginia Murchison Linthicum Scholar in Medical Research and funded by NIH (GM124958 and  
894 HD109239), the American Cancer Society (134230-RSG-20-043-01-DMC), and the Welch Foundation (I-  
895 2025). J.W. is a New York Stem Cell Foundation–Robertson Investigator and Virginia Murchison Linthicum  
896 Scholar in Medical Research and funded by CPRIT (RR170076), NIH (GM138565-01A1 and OD028763), Welch  
897 (854671). The Nikon SoRa spinning disk microscope was purchased by the UTSW quantitative light microscopy core  
898 with a Shared Instrumentation grant from NIH award: 1S10OD028630-01 to Katherine Luby-Phelps.



899

900 **Conflict of interests**

901 The authors report no conflict of interest.

**Table 1. Media formulations.**

| <b>MEDIA FORMULATIONS</b>                                                                                                                                                  | <b>Stage</b>                        | <b>SOURCE</b>                                                                                                                                                                              | <b>IDENTIFIER</b>                                                                                                                                                                                                                                                       |
|----------------------------------------------------------------------------------------------------------------------------------------------------------------------------|-------------------------------------|--------------------------------------------------------------------------------------------------------------------------------------------------------------------------------------------|-------------------------------------------------------------------------------------------------------------------------------------------------------------------------------------------------------------------------------------------------------------------------|
| <b>2i/L:</b> N2B27 base, 10ng/ml LIF, 3 $\mu$ M Chir99021, 1 $\mu$ M PD032590.                                                                                             | Naïve mouse PSCs                    | Qi-long, Y. <i>et al.</i> , 2008, <i>Nature</i> <sup>2</sup><br>Sato, N. <i>et al.</i> , 2004. <i>Nat Med</i> <sup>5</sup>                                                                 | <a href="https://doi.org/10.1038/nature06968">https://doi.org/10.1038/nature06968</a><br><a href="https://doi.org/10.1038/nm979">https://doi.org/10.1038/nm979</a>                                                                                                      |
| <b>2i/L + VitC:</b> N2B27 base, 10ng/ml LIF, 3 $\mu$ M Chir99021, 1 $\mu$ M PD0325901, 100 $\mu$ g/ml L-ascorbic acid.                                                     | Naïve mouse PSCs                    | Blaschke, K. <i>et al.</i> , 2013, <i>Nature</i> <sup>49</sup><br>Walter, M. <i>et al.</i> 2016, <i>Elife</i> <sup>50</sup>                                                                | <a href="https://doi.org/10.7554/eLife.11418">https://doi.org/10.7554/eLife.11418</a><br><a href="https://doi.org/10.1038/nature12362">https://doi.org/10.1038/nature12362</a>                                                                                          |
| <b>t2i/L:</b> N2B27 base, 10ng/ml LIF, 3 $\mu$ M Chir99021, 0.2 $\mu$ M PD0325901, 1% FBS.                                                                                 | Naïve-like mouse PSCs               | Gretarsson, K.H, <i>et al.</i> , 2020, <i>Nat Struct Mol Biol</i> <sup>43</sup>                                                                                                            | <a href="https://doi.org/10.1016/j.stemcr.2017.05.014">https://doi.org/10.1016/j.stemcr.2017.05.014</a>                                                                                                                                                                 |
| <b>FA (48h):</b> N2B27 base, 12ng/ml FGF2 and 20ng/ml Activin A.                                                                                                           | Epiblast-like stem cells (EpiLSCs). | Hayashi, K. <i>et al.</i> , 2011, <i>Cell</i> <sup>7</sup>                                                                                                                                 | <a href="https://doi.org/10.1016/j.cell.2011.06.052">https://doi.org/10.1016/j.cell.2011.06.052</a>                                                                                                                                                                     |
| <b>NBFR:</b> N2B27 base, 20 ng/mL FGF2 and 2.5 $\mu$ M IWR-1.                                                                                                              | Epiblast stem cells (EpiSCs).       | Brons, I. <i>et al.</i> , 200, <i>Nature</i> . <sup>8</sup><br>Tesar, P. J. <i>et al.</i> , 2007, <i>Nature</i> . <sup>9</sup><br>Wu, J. <i>et al.</i> , 2015, <i>Nature</i> <sup>29</sup> | <a href="https://doi.org/10.1038/nature05950">https://doi.org/10.1038/nature05950</a><br><a href="https://doi.org/10.1038/nature05972">https://doi.org/10.1038/nature05972</a><br><a href="https://doi.org/10.1038/nature14413">https://doi.org/10.1038/nature14413</a> |
| <b>AloXR:</b> N2B27 base, 3ng/ml of activin A, 2 $\mu$ M XAV939 and 1.0 $\mu$ M BMS493                                                                                     | Formative PSCs                      | Kinoshita <i>et al.</i> , 2021, <i>Cell Stem Cell</i> <sup>27</sup>                                                                                                                        | <a href="https://doi.org/10.1016/j.stem.2020.11.005">https://doi.org/10.1016/j.stem.2020.11.005</a>                                                                                                                                                                     |
| <b>FAC:</b> N2B27 base, 1% BSA, , 20ng/ml Activin A, 20ng/ml FGF2 ,3 $\mu$ M Chir99021.                                                                                    | Formative PSCs                      | Yu, <i>et al.</i> , 2021, <i>Nature</i>                                                                                                                                                    | <a href="https://doi.org/10.1038/s41586-021-03356-y">https://doi.org/10.1038/s41586-021-03356-y</a>                                                                                                                                                                     |
| <b>5i/LA:</b> 1 $\mu$ M PD0325901, 0.5 $\mu$ M IM-12, 0.5 $\mu$ M SB590885, 1 $\mu$ M WH-4-023, 20 ng/ml recombinant human LIF, 10 ng/ml Activin A, and 5 $\mu$ M Y-27632. | Naïve human PSCs                    | Theunissen, T. W., <i>et al.</i> 2014, <i>Cell Stem Cell</i>                                                                                                                               | <a href="https://doi.org/10.1016/j.stem.2014.07.002">https://doi.org/10.1016/j.stem.2014.07.002</a>                                                                                                                                                                     |

|                                                                                                                                                                                                                                                                                                                                                                                                              |                                                             |                                                                                                   |                                                                                                            |
|--------------------------------------------------------------------------------------------------------------------------------------------------------------------------------------------------------------------------------------------------------------------------------------------------------------------------------------------------------------------------------------------------------------|-------------------------------------------------------------|---------------------------------------------------------------------------------------------------|------------------------------------------------------------------------------------------------------------|
| <p><b>eHDM:</b> N2B27 base, 1% BSA, 20 ng/ml bFGF (Peprotech), 20 ng/ml activin A, 3 <math>\mu</math>M CHIR99021 and CEPT cocktail [50 nM Chroman 1 , 5 <math>\mu</math>M Emricasan, 1X polyamine supplement, and 0.7 <math>\mu</math>M TransISRIB ].</p>                                                                                                                                                    | <p>Enhanced hypoblast differentiation media (eHDM)</p>      | <p>L. Yu, D. Logsdon, C. A. Pinzon-Arteaga., et al, 2023, <i>Cell Stem Cell</i><sup>108</sup></p> | <p><a href="https://doi.org/10.1016/j.stem.2023.08.002">https://doi.org/10.1016/j.stem.2023.08.002</a></p> |
| <p><b>eTDM</b> N2B27 base, 1% BSA, 1 <math>\mu</math>M PD0325901, 2 <math>\mu</math>M A83-01( or 1 <math>\mu</math>M A83-01, 1 <math>\mu</math>M A77-01), 0.5 <math>\mu</math>M SB590885, 1 <math>\mu</math>M WH-4-023, 10 ng/ml LIF, 0.5 <math>\mu</math>M LPA and and CEPT cocktail [50 nM Chroman 1 , 5 <math>\mu</math>M Emricasan , 1X polyamine supplement, and 0.7 <math>\mu</math>M TransISRIB].</p> | <p>Enhanced throphectoderm differentiation media (eTDM)</p> | <p>L. Yu, D. Logsdon, C. A. Pinzon-Arteaga., et al, 2023, <i>Cell Stem Cell</i><sup>108</sup></p> | <p><a href="https://doi.org/10.1016/j.stem.2023.08.002">https://doi.org/10.1016/j.stem.2023.08.002</a></p> |

**Table 2. Antibodies**

| <b>ANTIBODIES</b>            | <b>SOURCE</b>             | <b>IDENTIFIER</b>                   |
|------------------------------|---------------------------|-------------------------------------|
| α-Oct-3/4 (C-10) antibody    | Santa Cruz Biotechnology  | Cat# sc-5279, RRID:AB_628051        |
| α-Sox-2 (E-4) antibody       | Santa Cruz Biotechnology  | Cat#sc-365823,<br>RRID:AB_10842165  |
| α-H3K9me3                    | Cell Signaling Technology | Cat# 13969, RRID:AB_2798355         |
| α-H3K9me3                    | Abcam                     | ab8898, RRID:AB_306848              |
| α-Flag                       | Cell Signaling            | 2368T, RRID:AB_2217020              |
| α-H3K27me3                   | Cell Signaling Technology | Cat# 9733, RRID:AB_2616029)         |
| α-5mC                        | Active Motif              | Cat# <a href="#">39649</a>          |
| α-5hmC                       | Active Motif              | Cat# <a href="#">39092</a>          |
| α-Human Gata-6               | R&D Systems               | Cat# AF1700; RRID:AB_2108901        |
| α-Phospho P-p53 (S15)        | Cell Signaling Technology | Cat# 9286, RRID:AB_331741           |
| α-P53(1C12)                  | Cell Signaling Technology | Cat# 2524, RRID:AB_331743           |
| α-Phospho-H3 (Serine 10)     | Santa Cruz                | Cat# sc-374669,<br>RRID:AB_11150094 |
| α-H2AX (γH2AX), (Serine 139) | Abcam                     | Cat# ab81299, RRID:AB_1640564       |
| α-TASOR (FAM208A)            | Atlas Antibodies          | Cat# HPA006735,<br>RRID:AB_1852384  |
| α-TASOR (FAM208A)            | Atlas Antibodies          | Cat# HPA017142,<br>RRID:AB_1852382  |
| α-MPP8                       | Proteintech               | Cat# 16796-1-AP,<br>RRID:AB_2266644 |

|                                                        |                           |                                    |
|--------------------------------------------------------|---------------------------|------------------------------------|
| α- Beta Tububilin                                      | Santa Cruz                | Cat# sc-5274, RRID:AB_2288090      |
| α-P-smad2/3                                            | Cell Signaling Technology | Cat# 8828, RRID:AB_2631089         |
| α-Smad2/3                                              | Abcam                     | Cat# ab202445                      |
| α-Anti-LINE-1 ORF1p                                    | Abcam                     | Cat# ab216324,<br>RRID:AB_2921327  |
| α-Anti Flag M2                                         | Millipore sigma           | Cat# <u>F3165</u> , RRID:AB_259529 |
| α-BrdU                                                 | BD Biosciences            | Cat# 347580, RRID:AB_10015219      |
| α-CldU                                                 | Abcam                     | Cat# ab6326, RRID:AB_305426        |
| Donkey α-rabbit IgG (H+L)Antibody,<br>Alexa Fluor™ 647 | Invitrogen                | Cat# A31573, RRID: AB_2536183      |
| Donkey α-mouse IgG (H+L)<br>Antibody, Alexa Fluor™488  | Invitrogen                | Cat# A21202, RRID: AB_141607       |
| Donkey α-Goat IgG (H+L) Antibody,<br>Alexa Fluor™ 555  | Invitrogen                | Cat# A-21432, RRID: AB_2535853     |

**Table 3. gRNAs and primers**

| Species | Name                 | SEQUENCE                   | Size bp |
|---------|----------------------|----------------------------|---------|
| Mouse   | TASOR sgRNA 1        | TTTCTCTTGTGAATATGGCC       |         |
| Mouse   | TASOR sgRNA 2        | AGTTATTTCTCTTGTGAATA       |         |
| Mouse   | TASOR genotyping FW  | ACGCGAGCACGTTGGGTAGCCA     | 856     |
| Mouse   | TASOR genotyping RV  | GGGCACCGAGCACCATCTTTCCGCT  | 856     |
| Mouse   | Mavs gRNA 1          | GGTCACAACATCCCTGACCA       |         |
| Mouse   | Mavs genotyping FW 1 | GGAGACTAGATGCCCCAAGC       | 434     |
| Mouse   | Mavs genotyping RV 1 | TGCTAAGGGGTCCACAGGTA       | 434     |
| Mouse   | Mavs gRNA 2          | GGGAACCGGGACACACTCTG       |         |
| Mouse   | Mavs genotyping FW 2 | GCCTGCAAACCTTGATGTGG       | 441     |
| Mouse   | Mavs genotyping RV 2 | GCAATGGCCCAGGAAAAAGG       | 441     |
| Human   | TASOR sgRNA 1        | TTGCAGCCTTTATGAAGTTG       |         |
| Human   | TASOR sgRNA 2        | GTTTCCTTATAAAACAGTGC       |         |
| Human   | TASOR genotyping FW  | AGCTGCCCTGGAGGTTGAGGTGGGA  | 1138    |
| Human   | TASOR genotyping RV  | TGAGCCACCAACGCCCGGCTGATA   | 1138    |
| Mouse   | GAPDH qPCR FW        | ACAGTCCATGCCATCACTGCC      |         |
| Mouse   | GAPDH qPCR RV        | GCCTGCTTCACCACCTTCTTG      |         |
| Mouse   | TBP qPCR FW          | GAAGAACAATCCAGACTAGCAGCA   |         |
| Mouse   | TBP qPCR RV          | CCTTATAGGGAACCTTCACATCACAG |         |
| Mouse   | mB-Actin-For         | CTCTGGCTCCTAGCACCATGAAGA   |         |
| Mouse   | mB-Actin-REV         | GTAAAACGCAGCTCAGTAACAGTCCG |         |
| Mouse   | LINE-1 qPCR FW       | TTTGGGACACAATGAAAGCA       |         |
| Mouse   | LINE-1 qPCR RV       | CTGCCGTCTACTCCTCTTGG       |         |
| Mouse   | TASOR qPCR FW        | CCACGGTTTCTATTGAGCATG      |         |
| Mouse   | TASOR qPCR RV        | TTTGTCTCACCATGTTTCCC       |         |
| Mouse   | Major satellite FW   | AAATACACACTTTAGGACG        |         |

|       |                    |                            |     |
|-------|--------------------|----------------------------|-----|
| Mouse | Major satellite RV | TCAAGTGGATGTTTCTCATT       |     |
| Mouse | Igf2 FW            | GTCGATGTTGGTGCTTCTCATC     |     |
| Mouse | Igf2 RV            | GGGTATCTGGGGAAGTCGT        |     |
| Mouse | Igf2-R FW          | CTGGAGGTGATGAGTGTAGCTCTGGC |     |
| Mouse | Igf2-R RV          | GAGTGACGAGCCAACACAGACAGGTC |     |
| Mouse | Dux FW             | ACTTCTAGCCCCAGCGACTC       |     |
| Mouse | Dux RV             | CCATGCTGCCAGGATTTCTA       |     |
| Mouse | mERVL FW           | CTTCCATTACAGCTGCGACTG      |     |
| Mouse | mERVL RV           | CTAGAACCACTCCTGGTACCAAC    |     |
| Mouse | Mrc1 C FW          | GATCCTCAACCCAAGGGCTC       |     |
| Mouse | Mrc1 C RV          | ACCAATGCAACCCAGTGCTA       |     |
| Human | GAPDH qPCR FW      | GTCTCCTCTGACTTCAACAGCG     | 131 |
| Human | GAPDH qPCR RV      | ACCACCCTGTTGCTGTAGCCAA     | 131 |
| Human | B-Actin-FW         | CACCATTGGCAATGAGCGGTTC     | 135 |
| Human | B-Actin-RV         | AGGTCTTTGCGGATGTCCACGT     | 135 |
| Human | TASOR qPCR FW      | TGAAGACATTGCAGGTTTCATTC    |     |
| Human | TASOR qPCR RV      | CATCCAGGCTATCAACACCAG      |     |
| Human | OCT4 FW            | GCTTCAAGAACATGTGTAAGCTG    |     |
| Human | OCT4 RV            | CACGAGGGTTTCTGCTTTG        |     |
| Human | L1                 | AATGAGATCACATGGACACAGGAAG  | 195 |
| Human | L1                 | TGTATACATGTGCCATGCTGGTGC   | 195 |

## 1 Biography

- 2 1 Silva, J. *et al.* Promotion of Reprogramming to Ground State Pluripotency by Signal Inhibition. *PLoS biology* **6**, e253 (2008). <https://doi.org/10.1371/journal.pbio.0060253>
- 3 2 Ying, Q. L. *et al.* The ground state of embryonic stem cell self-renewal. *Nature* **453**, 519-523 (2008).  
4 <https://doi.org/10.1038/nature06968>
- 5 3 Takashima, Y. *et al.* Resetting Transcription Factor Control Circuitry toward Ground-State  
6 Pluripotency in Human. *Cell* **162**, 452-453 (2015). <https://doi.org/10.1016/j.cell.2015.06.052>
- 7 4 Blaschke, K. *et al.* VitaminC induces Tet-dependent DNA demethylation and a blastocyst-like  
8 state in ES cells. *Nature* **500**, 222-226 (2013). <https://doi.org/10.1038/nature12362>
- 9 5 Sato, N., Meijer, L., Skaltsounis, L., Greengard, P. & Brivanlou, A. H. Maintenance of pluripotency  
10 in human and mouse embryonic stem cells through activation of Wnt signaling by a  
11 pharmacological GSK-3-specific inhibitor. *Nat Med* **10**, 55-63 (2004).  
12 <https://doi.org/10.1038/nm979>
- 13 6 Rodriguez-Martin, B. *et al.* Pan-cancer analysis of whole genomes identifies driver rearrangements  
14 promoted by LINE-1 retrotransposition. *Nature Genetics* **52**, 306-319 (2020).  
15 <https://doi.org/10.1038/s41588-019-0562-0>
- 16 7 Hayashi, K., Ohta, H., Kurimoto, K., Aramaki, S. & Saitou, M. Reconstitution of the mouse germ  
17 cell specification pathway in culture by pluripotent stem cells. *Cell* **146**, 519-532 (2011).  
18 <https://doi.org/10.1016/j.cell.2011.06.052>
- 19 8 Brons, I. G. *et al.* Derivation of pluripotent epiblast stem cells from mammalian embryos. *Nature*  
20 **448**, 191-195 (2007). <https://doi.org/10.1038/nature05950>
- 21 9 Tesar, P. J. *et al.* New cell lines from mouse epiblast share defining features with human embryonic  
22 stem cells. *Nature* **448**, 196-199 (2007). <https://doi.org/10.1038/nature05972>
- 23 10 Nichols, J. & Smith, A. Naive and Primed Pluripotent States. *Cell Stem Cell* **4**, 487-492 (2009).  
24 <https://doi.org/https://doi.org/10.1016/j.stem.2009.05.015>
- 25 11 Nurk, S. *et al.* The complete sequence of a human genome. *Science* **376**, 44-53 (2022).  
26 <https://doi.org/10.1126/science.abj6987>
- 27 12 Jachowicz, J. W. *et al.* LINE-1 activation after fertilization regulates global chromatin accessibility  
28 in the early mouse embryo. *Nature Genetics* **49**, 1502-1510 (2017).  
29 <https://doi.org/10.1038/ng.3945>
- 30 13 Leitch, H. G. *et al.* Naive pluripotency is associated with global DNA hypomethylation. *Nature*  
31 *structural & molecular biology* **20**, 311-316 (2013). <https://doi.org/10.1038/nsmb.2510>
- 32 14 Simon, M. *et al.* LINE1 Derepression in Aged Wild-Type and SIRT6-Deficient Mice Drives  
33 Inflammation. *Cell metabolism* **29**, 871-885.e875 (2019).  
34 <https://doi.org/10.1016/j.cmet.2019.02.014>
- 35 15 Rodríguez-Martín, C. *et al.* Familial retinoblastoma due to intronic LINE-1 insertion causes aberrant  
36 and noncanonical mRNA splicing of the RB1 gene. *J Hum Genet* **61**, 463-466 (2016).  
37 <https://doi.org/10.1038/jhg.2015.173>
- 38 16 Seczynska, M., Bloor, S., Cuesta, S. M. & Lehner, P. J. Genome surveillance by HUSH-mediated  
39 silencing of intronless mobile elements. *Nature* **601**, 440-445 (2022).  
40 <https://doi.org/10.1038/s41586-021-04228-1>
- 41 17 Tchasonnikarova, I. A. *et al.* GENE SILENCING. Epigenetic silencing by the HUSH complex  
42 mediates position-effect variegation in human cells. *Science* **348**, 1481-1485 (2015).  
43 <https://doi.org/10.1126/science.aaa7227>
- 44 18 Robbez-Masson, L. *et al.* The HUSH complex cooperates with TRIM28 to repress young  
45 retrotransposons and new genes. *Genome Res* **28**, 836-845 (2018).  
46 <https://doi.org/10.1101/gr.228171.117>
- 47 19 Tunbak, H. *et al.* The HUSH complex is a gatekeeper of type I interferon through epigenetic  
48 regulation of LINE-1s. *Nature communications* **11**, 5387 (2020). <https://doi.org/10.1038/s41467-020-19170-5>
- 49  
50



- 51 20 Douse, C. H. *et al.* TASOR is a pseudo-PARP that directs HUSH complex assembly and epigenetic  
52 transposon control. *Nature communications* **11**, 4940 (2020). [https://doi.org/10.1038/s41467-](https://doi.org/10.1038/s41467-020-18761-6)  
53 [020-18761-6](https://doi.org/10.1038/s41467-020-18761-6)
- 54 21 Wang, X. *et al.* Formative pluripotent stem cells show features of epiblast cells poised for  
55 gastrulation. *Cell Res* **31**, 526-541 (2021). <https://doi.org/10.1038/s41422-021-00477-x>
- 56 22 Yang, P. *et al.* Multi-omic Profiling Reveals Dynamics of the Phased Progression of Pluripotency.  
57 *Cell Syst* **8**, 427-445.e410 (2019). <https://doi.org/10.1016/j.cels.2019.03.012>
- 58 23 Harten, S. K. *et al.* The first mouse mutants of D14Abb1e (Fam208a) show that it is critical for early  
59 development. *Mamm Genome* **25**, 293-303 (2014). <https://doi.org/10.1007/s00335-014-9516-0>
- 60 24 Bhargava, S. *et al.* The epigenetic modifier Fam208a is required to maintain epiblast cell fitness.  
61 *Scientific Reports* **7**, 9322 (2017). <https://doi.org/10.1038/s41598-017-09490-w>
- 62 25 Jinek, M. *et al.* A programmable dual-RNA-guided DNA endonuclease in adaptive bacterial  
63 immunity. *Science* **337**, 816-821 (2012). <https://doi.org/science.1225829> [pii]  
64 [10.1126/science.1225829](https://doi.org/10.1126/science.1225829) [doi]
- 65 26 Yu, L. *et al.* Derivation of Intermediate Pluripotent Stem Cells Amenable to Primordial Germ Cell  
66 Specification. *Cell Stem Cell* **28**, 550-567 e512 (2021). <https://doi.org/10.1016/j.stem.2020.11.003>
- 67 27 Kinoshita, M. *et al.* Capture of Mouse and Human Stem Cells with Features of Formative  
68 Pluripotency. *Cell Stem Cell* **28**, 453-471.e458 (2021).  
69 <https://doi.org/https://doi.org/10.1016/j.stem.2020.11.005>
- 70 28 Kojima, Y. *et al.* The Transcriptional and Functional Properties of Mouse Epiblast Stem Cells  
71 Resemble the Anterior Primitive Streak. *Cell Stem Cell* **14**, 107-120 (2014).  
72 <https://doi.org/https://doi.org/10.1016/j.stem.2013.09.014>
- 73 29 Wu, J. *et al.* An alternative pluripotent state confers interspecies chimaeric competency. *Nature*  
74 **521**, 316-321 (2015). <https://doi.org/10.1038/nature14413>
- 75 30 Yuan, J. & Ofengeim, D. A guide to cell death pathways. *Nature Reviews Molecular Cell Biology*  
76 (2023). <https://doi.org/10.1038/s41580-023-00689-6>
- 77 31 Lee, S. *et al.* AIM2 forms a complex with pyrin and ZBP1 to drive PANoptosis and host defence.  
78 *Nature* (2021). <https://doi.org/10.1038/s41586-021-03875-8>
- 79 32 Gu, Z. *et al.* Silencing of LINE-1 retrotransposons is a selective dependency of myeloid leukemia.  
80 *Nature Genetics* **53**, 672-682 (2021). <https://doi.org/10.1038/s41588-021-00829-8>
- 81 33 Li, Z. *et al.* Asymmetric distribution of parental H3K9me3 in S phase silences L1 elements. *Nature*  
82 (2023). <https://doi.org/10.1038/s41586-023-06711-3>
- 83 34 Engeland, K. Cell cycle regulation: p53-p21-RB signaling. *Cell Death & Differentiation* **29**, 946-960  
84 (2022). <https://doi.org/10.1038/s41418-022-00988-z>
- 85 35 Yesbolatova, A. *et al.* The auxin-inducible degron 2 technology provides sharp degradation control  
86 in yeast, mammalian cells, and mice. *Nature communications* **11**, 5701 (2020).  
87 <https://doi.org/10.1038/s41467-020-19532-z>
- 88 36 . (!!! INVALID CITATION !!! 44).
- 89 37 Ayrapetov, M. K., Gursoy-Yuzugullu, O., Xu, C., Xu, Y. & Price, B. D. DNA double-strand breaks  
90 promote methylation of histone H3 on lysine 9 and transient formation of repressive chromatin.  
91 *Proc Natl Acad Sci U S A* **111**, 9169-9174 (2014). <https://doi.org/10.1073/pnas.1403565111>
- 92 38 Zhang, L. & Li, D. Q. MORC2 regulates DNA damage response through a PARP1-dependent  
93 pathway. *Nucleic Acids Res* **47**, 8502-8520 (2019). <https://doi.org/10.1093/nar/gkz545>
- 94 39 Gaggioli, V. *et al.* Dynamic de novo heterochromatin assembly and disassembly at replication  
95 forks ensures fork stability. *Nature cell biology* **25**, 1017-1032 (2023).  
96 <https://doi.org/10.1038/s41556-023-01167-z>
- 97 40 Spindel, J. *et al.* The distinct effects of MEK and GSK3 inhibition upon the methylome and  
98 transcriptome of mouse embryonic stem cells. *bioRxiv*, 2021.2011.2018.469000 (2021).  
99 <https://doi.org/10.1101/2021.11.18.469000>
- 100 41 von Meyenn, F. *et al.* Impairment of DNA Methylation Maintenance Is the Main Cause of Global  
101 Demethylation in Naive Embryonic Stem Cells. *Molecular cell* **62**, 983 (2016).  
102 <https://doi.org/10.1016/j.molcel.2016.06.005>

- 103 42 Yamaji, M. *et al.* PRDM14 ensures naive pluripotency through dual regulation of signaling and  
104 epigenetic pathways in mouse embryonic stem cells. *Cell Stem Cell* **12**, 368-382 (2013).  
105 <https://doi.org/10.1016/j.stem.2012.12.012>
- 106 43 Gretarsson, K. H. & Hackett, J. A. Dppa2 and Dppa4 counteract de novo methylation to establish  
107 a permissive epigenome for development. *Nature structural & molecular biology* **27**, 706-716  
108 (2020). <https://doi.org/10.1038/s41594-020-0445-1>
- 109 44 Cimmino, L., Neel, B. G. & Aifantis, I. Vitamin C in Stem Cell Reprogramming and Cancer. *Trends*  
110 *in cell biology* **28**, 698-708 (2018). <https://doi.org/https://doi.org/10.1016/j.tcb.2018.04.001>
- 111 45 Brabson, J. P., Leesang, T., Mohammad, S. & Cimmino, L. Epigenetic Regulation of Genomic  
112 Stability by Vitamin C. *Front Genet* **12**, 675780 (2021). <https://doi.org/10.3389/fgene.2021.675780>
- 113 46 Jia, G. *et al.* N6-Methyladenosine in nuclear RNA is a major substrate of the obesity-associated  
114 FTO. *Nature Chemical Biology* **7**, 885-887 (2011). <https://doi.org/10.1038/nchembio.687>
- 115 47 Zheng, G. *et al.* ALKBH5 Is a Mammalian RNA Demethylase that Impacts RNA Metabolism and  
116 Mouse Fertility. *Molecular cell* **49**, 18-29 (2013).  
117 <https://doi.org/https://doi.org/10.1016/j.molcel.2012.10.015>
- 118 48 Yin, R. *et al.* Ascorbic acid enhances Tet-mediated 5-methylcytosine oxidation and promotes DNA  
119 demethylation in mammals. *J Am Chem Soc* **135**, 10396-10403 (2013).  
120 <https://doi.org/10.1021/ja4028346>
- 121 49 Blaschke, K. *et al.* Vitamin C induces Tet-dependent DNA demethylation and a blastocyst-like  
122 state in ES cells. *Nature* **500**, 222-226 (2013). <https://doi.org/10.1038/nature12362>
- 123 50 Walter, M., Teissandier, A., Pérez-Palacios, R. & Bourc'his, D. An epigenetic switch ensures  
124 transposon repression upon dynamic loss of DNA methylation in embryonic stem cells. *Elife* **5**  
125 (2016). <https://doi.org/10.7554/eLife.11418>
- 126 51 Cheng, K. C. L. *et al.* Vitamin C activates young LINE-1 elements in mouse embryonic stem cells  
127 via H3K9me3 demethylation. *bioRxiv*, 2023.2008.2007.552254 (2023).  
128 <https://doi.org/10.1101/2023.08.07.552254>
- 129 52 Yu, X.-X. *et al.* Ascorbic acid induces global epigenetic reprogramming to promote meiotic  
130 maturation and developmental competence of porcine oocytes. *Scientific Reports* **8**, 6132 (2018).  
131 <https://doi.org/10.1038/s41598-018-24395-y>
- 132 53 Gabrielle, B., Laura, J. S., Matthew, M. & Christopher, J. P. Vitamin C and Transferrin Reduce RNA  
133 Methylation in Mouse Embryonic Stem Cells. *bioRxiv*, 2023.2002.2023.529811 (2023).  
134 <https://doi.org/10.1101/2023.02.23.529811>
- 135 54 Müller, I. *et al.* MPP8 is essential for sustaining self-renewal of ground-state pluripotent stem cells.  
136 *Nature communications* **12**, 3034 (2021). <https://doi.org/10.1038/s41467-021-23308-4>
- 137 55 Mathieu, S. *et al.* DNA methylation restricts coordinated germline and neural fates in embryonic  
138 stem cell differentiation. *bioRxiv*, 2022.2010.2022.513040 (2022).  
139 <https://doi.org/10.1101/2022.10.22.513040>
- 140 56 Pandiloski, N. *et al.* DNA methylation governs the sensitivity of repeats to restriction by the HUSH-  
141 MORC2 corepressor. *bioRxiv*, 2023.2006.2021.545516 (2023).  
142 <https://doi.org/10.1101/2023.06.21.545516>
- 143 57 Woodcock, D. M., Lawler, C. B., Linsenmeyer, M. E., Doherty, J. P. & Warren, W. D. Asymmetric  
144 methylation in the hypermethylated CpG promoter region of the human L1 retrotransposon. *J Biol*  
145 *Chem* **272**, 7810-7816 (1997). <https://doi.org/10.1074/jbc.272.12.7810>
- 146 58 Seczynska, M. & Lehner, P. J. The sound of silence: mechanisms and implications of HUSH  
147 complex function. *Trends in genetics : TIG* **39**, 251-267 (2023).  
148 <https://doi.org/10.1016/j.tig.2022.12.005>
- 149 59 Liu, N. *et al.* Selective silencing of euchromatic L1s revealed by genome-wide screens for L1  
150 regulators. *Nature* **553**, 228-232 (2018). <https://doi.org/10.1038/nature25179>
- 151 60 Kaya-Okur, H. S. *et al.* CUT&Tag for efficient epigenomic profiling of small samples and single  
152 cells. *Nature communications* **10**, 1930 (2019). <https://doi.org/10.1038/s41467-019-09982-5>
- 153 61 Buenrostro, J. D., Wu, B., Chang, H. Y. & Greenleaf, W. J. ATAC-seq: A Method for Assaying  
154 Chromatin Accessibility Genome-Wide. *Curr Protoc Mol Biol* **109**, 21.29.21-21.29.29 (2015).  
155 <https://doi.org/10.1002/0471142727.mb2129s109>

- 156 62 Ilik, I. A. *et al.* Autonomous transposons tune their sequences to ensure somatic suppression. *Nature* (2024). <https://doi.org/10.1038/s41586-024-07081-0>
- 157
- 158 63 Cosby, R. L. *et al.* Recurrent evolution of vertebrate transcription factors by transposase capture. *Science* **371**, eabc6405 (2021). <https://doi.org/doi:10.1126/science.abc6405>
- 159
- 160 64 Xie, H. Y., Zhang, T. M., Hu, S. Y., Shao, Z. M. & Li, D. Q. Dimerization of MORC2 through its C-terminal coiled-coil domain enhances chromatin dynamics and promotes DNA repair. *Cell communication and signaling : CCS* **17**, 160 (2019). <https://doi.org/10.1186/s12964-019-0477-5>
- 161
- 162 65 Tchakovnikarova, I. A. *et al.* Hyperactivation of HUSH complex function by Charcot-Marie-Tooth disease mutation in MORC2. *Nat Genet* **49**, 1035-1044 (2017). <https://doi.org/10.1038/ng.3878>
- 163
- 164 66 Matkovic, R. *et al.* TASOR epigenetic repressor cooperates with a CNOT1 RNA degradation pathway to repress HIV. *Nature communications* **13**, 66 (2022). <https://doi.org/10.1038/s41467-021-27650-5>
- 165
- 166 67 Garland, W. *et al.* Chromatin modifier HUSH co-operates with RNA decay factor NEXT to restrict transposable element expression. *Molecular cell* **82**, 1691-1707.e1698 (2022). <https://doi.org/https://doi.org/10.1016/j.molcel.2022.03.004>
- 167
- 168 68 Spencley, A. L. *et al.* Co-transcriptional genome surveillance by HUSH is coupled to termination machinery. *Molecular cell* **83**, 1623-1639.e1628 (2023). <https://doi.org/https://doi.org/10.1016/j.molcel.2023.04.014>
- 169
- 170 69 Zhang, S.-M. *et al.* KDM5B promotes immune evasion by recruiting SETDB1 to silence retroelements. *Nature* **598**, 682-687 (2021). <https://doi.org/10.1038/s41586-021-03994-2>
- 171
- 172 70 Douse, C. H. *et al.* TASOR is a pseudo-PARP that directs HUSH complex assembly and epigenetic transposon control. *bioRxiv*, 2020.2003.2009.974832 (2020). <https://doi.org/10.1101/2020.03.09.974832>
- 173
- 174 71 Holoch, D. & Moazed, D. RNA-mediated epigenetic regulation of gene expression. *Nat Rev Genet* **16**, 71-84 (2015). <https://doi.org/10.1038/nrg3863>
- 175
- 176 72 Verdel, A. *et al.* RNAi-mediated targeting of heterochromatin by the RITS complex. *Science* **303**, 672-676 (2004). <https://doi.org/10.1126/science.1093686>
- 177
- 178 73 Meng, S. *et al.* Young LINE-1 transposon 5' UTRs marked by elongation factor ELL3 function as enhancers to regulate naïve pluripotency in embryonic stem cells. *Nature cell biology* **25**, 1319-1331 (2023). <https://doi.org/10.1038/s41556-023-01211-y>
- 179
- 180 74 Epsztejn-Litman, S. *et al.* De novo DNA methylation promoted by G9a prevents reprogramming of embryonically silenced genes. *Nature structural & molecular biology* **15**, 1176-1183 (2008). <https://doi.org/10.1038/nsmb.1476>
- 181
- 182 75 Lehnertz, B. *et al.* Suv39h-mediated histone H3 lysine 9 methylation directs DNA methylation to major satellite repeats at pericentric heterochromatin. *Curr Biol* **13**, 1192-1200 (2003). [https://doi.org/10.1016/s0960-9822\(03\)00432-9](https://doi.org/10.1016/s0960-9822(03)00432-9)
- 183
- 184 76 Grewal, S. I. S. & Jia, S. Heterochromatin revisited. *Nature Reviews Genetics* **8**, 35-46 (2007). <https://doi.org/10.1038/nrg2008>
- 185
- 186 77 Zhang, Y. *et al.* Dynamic epigenomic landscapes during early lineage specification in mouse embryos. *Nat Genet* **50**, 96-105 (2018). <https://doi.org/10.1038/s41588-017-0003-x>
- 187
- 188 78 Rothbart, S. B. *et al.* Association of UHRF1 with methylated H3K9 directs the maintenance of DNA methylation. *Nature structural & molecular biology* **19**, 1155-1160 (2012). <https://doi.org/10.1038/nsmb.2391>
- 189
- 190 79 Ren, W. *et al.* Direct readout of heterochromatic H3K9me3 regulates DNMT1-mediated maintenance DNA methylation. *Proceedings of the National Academy of Sciences* **117**, 18439 (2020). <https://doi.org/10.1073/pnas.2009316117>
- 191
- 192 80 Chang, Y. *et al.* MPP8 mediates the interactions between DNA methyltransferase Dnmt3a and H3K9 methyltransferase GLP/G9a. *Nature communications* **2**, 533 (2011). <https://doi.org/10.1038/ncomms1549>
- 193
- 194 81 Garland, W. *et al.* Chromatin modifier HUSH co-operates with RNA decay factor NEXT to restrict transposable element expression. *Molecular cell* (2022). <https://doi.org/https://doi.org/10.1016/j.molcel.2022.03.004>
- 195
- 196
- 197
- 198
- 199
- 200
- 201
- 202
- 203
- 204
- 205
- 206
- 207

- 208 82 Wei, J. *et al.* FTO mediates LINE1 m6A demethylation and chromatin regulation in mESCs and  
209 mouse development. *Science* **376**, 968-973 (2022). <https://doi.org/10.1126/science.abe9582>  
210 83 Liu, J. *et al.* The RNA m(6)A reader YTHDC1 silences retrotransposons and guards ES cell identity.  
211 *Nature* **591**, 322-326 (2021). <https://doi.org/10.1038/s41586-021-03313-9>  
212 84 Chelmicki, T. *et al.* m(6)A RNA methylation regulates the fate of endogenous retroviruses. *Nature*  
213 **591**, 312-316 (2021). <https://doi.org/10.1038/s41586-020-03135-1>  
214 85 Wulfridge, P. & Sarma, K. A nuclease- and bisulfite-based strategy captures strand-specific R-  
215 loops genome-wide. *eLife* **10**, e65146 (2021). <https://doi.org/10.7554/eLife.65146>  
216 86 Mita, P. *et al.* BRCA1 and S phase DNA repair pathways restrict LINE-1 retrotransposition in  
217 human cells. *Nature structural & molecular biology* **27**, 179-191 (2020).  
218 <https://doi.org/10.1038/s41594-020-0374-z>  
219 87 Ardeljan, D. *et al.* Cell fitness screens reveal a conflict between LINE-1 retrotransposition and DNA  
220 replication. *Nature structural & molecular biology* **27**, 168-178 (2020).  
221 <https://doi.org/10.1038/s41594-020-0372-1>  
222 88 Gasior, S. L., Wakeman, T. P., Xu, B. & Deininger, P. L. The human LINE-1 retrotransposon creates  
223 DNA double-strand breaks. *J Mol Biol* **357**, 1383-1393 (2006).  
224 <https://doi.org/10.1016/j.jmb.2006.01.089>  
225 89 Chakraborty, P. & Grosse, F. Human DHX9 helicase preferentially unwinds RNA-containing  
226 displacement loops (R-loops) and G-quadruplexes. *DNA Repair* **10**, 654-665 (2011).  
227 <https://doi.org/https://doi.org/10.1016/j.dnarep.2011.04.013>  
228 90 Tatarakis, A., Saini, H. & Moazed, D. Requirements for establishment and epigenetic stability of  
229 mammalian heterochromatin. *bioRxiv*, 2023.2002.2027.530221 (2023).  
230 <https://doi.org/10.1101/2023.02.27.530221>  
231 91 Decombe, S. *et al.* Epigenetic rewriting at centromeric DNA repeats leads to increased chromatin  
232 accessibility and chromosomal instability. *Epigenetics & chromatin* **14**, 35 (2021).  
233 <https://doi.org/10.1186/s13072-021-00410-x>  
234 92 Guo, Y.-L., Gurung, C., Fendereski, M. & Huang, F. Dicer and PKR as Novel Regulators of  
235 Embryonic Stem Cell Fate and Antiviral Innate Immunity. *The Journal of Immunology* **208**, 2259-  
236 2266 (2022). <https://doi.org/10.4049/jimmunol.2200042>  
237 93 Hong, X. X. & Carmichael, G. G. Innate immunity in pluripotent human cells: attenuated response  
238 to interferon- $\beta$ . *J Biol Chem* **288**, 16196-16205 (2013). <https://doi.org/10.1074/jbc.M112.435461>  
239 94 Kasowitz, S. D. *et al.* Nuclear m6A reader YTHDC1 regulates alternative polyadenylation and  
240 splicing during mouse oocyte development. *PLoS Genet* **14**, e1007412 (2018).  
241 <https://doi.org/10.1371/journal.pgen.1007412>  
242 95 Matsui, T. *et al.* Proviral silencing in embryonic stem cells requires the histone methyltransferase  
243 ESET. *Nature* **464**, 927-931 (2010). <https://doi.org/10.1038/nature08858>  
244 96 Karimi, Mohammad M. *et al.* DNA Methylation and SETDB1/H3K9me3 Regulate Predominantly  
245 Distinct Sets of Genes, Retroelements, and Chimeric Transcripts in mESCs. *Cell Stem Cell* **8**, 676-  
246 687 (2011). <https://doi.org/https://doi.org/10.1016/j.stem.2011.04.004>  
247 97 Dodge, J. E., Kang, Y. K., Beppu, H., Lei, H. & Li, E. Histone H3-K9 methyltransferase ESET is  
248 essential for early development. *Mol Cell Biol* **24**, 2478-2486 (2004).  
249 <https://doi.org/10.1128/mcb.24.6.2478-2486.2004>  
250 98 Jiang, Q. *et al.* G9a Plays Distinct Roles in Maintaining DNA Methylation, Retrotransposon  
251 Silencing, and Chromatin Looping. *Cell reports* **33**, 108315 (2020).  
252 <https://doi.org/10.1016/j.celrep.2020.108315>  
253 99 Montavon, T. *et al.* Complete loss of H3K9 methylation dissolves mouse heterochromatin  
254 organization. *Nature communications* **12**, 4359 (2021). [https://doi.org/10.1038/s41467-021-](https://doi.org/10.1038/s41467-021-24532-8)  
255 [24532-8](https://doi.org/10.1038/s41467-021-24532-8)  
256 100 Peters, A. H. *et al.* Loss of the Suv39h histone methyltransferases impairs mammalian  
257 heterochromatin and genome stability. *Cell* **107**, 323-337 (2001). [https://doi.org/10.1016/s0092-](https://doi.org/10.1016/s0092-8674(01)00542-6)  
258 [8674\(01\)00542-6](https://doi.org/10.1016/s0092-8674(01)00542-6)  
259 101 Nicetto, D. *et al.* H3K9me3-heterochromatin loss at protein-coding genes enables developmental  
260 lineage specification. *Science* **363**, 294-297 (2019). <https://doi.org/10.1126/science.aau0583>

- 261 102 Bodak, M., Cirera-Salinas, D., Yu, J., Ngondo, R. P. & Ciaudo, C. Dicer, a new regulator of  
262 pluripotency exit and LINE-1 elements in mouse embryonic stem cells. *FEBS Open Bio* **7**, 204-  
263 220 (2017). <https://doi.org/10.1002/2211-5463.12174>
- 264 103 Gao, X. *et al.* The fat mass and obesity associated gene FTO functions in the brain to regulate  
265 postnatal growth in mice. *PLoS One* **5**, e14005 (2010).  
266 <https://doi.org/10.1371/journal.pone.0014005>
- 267 104 Belgnaoui, S. M., Gosden, R. G., Semmes, O. J. & Haoudi, A. Human LINE-1 retrotransposon  
268 induces DNA damage and apoptosis in cancer cells. *Cancer Cell International* **6**, 13 (2006).  
269 <https://doi.org/10.1186/1475-2867-6-13>
- 270 105 Müller, F. J. *et al.* Regulatory networks define phenotypic classes of human stem cell lines. *Nature*  
271 **455**, 401-405 (2008). <https://doi.org/10.1038/nature07213>
- 272 106 Cruz-Tapias, P., Robin, P., Pontis, J., Maestro, L. D. & Ait-Si-Ali, S. The H3K9 Methylation Writer  
273 SETDB1 and its Reader MPP8 Cooperate to Silence Satellite DNA Repeats in Mouse Embryonic  
274 Stem Cells. *Genes* **10** (2019).
- 275 107 Yang, H. *et al.* Allele-specific H3K9me3 and DNA methylation co-marked CpG-rich regions serve  
276 as potential imprinting control regions in pre-implantation embryo. *Nature cell biology* **24**, 783-792  
277 (2022). <https://doi.org/10.1038/s41556-022-00900-4>
- 278 108 Yu, L. *et al.* Large-scale production of human blastoids amenable to modeling blastocyst  
279 development and maternal-fetal cross talk. *Cell Stem Cell* **30**, 1246-1261.e1249 (2023).  
280 <https://doi.org/10.1016/j.stem.2023.08.002>
- 281 109 Chen, Y. *et al.* A versatile polypharmacology platform promotes cytoprotection and viability of  
282 human pluripotent and differentiated cells. *Nat Methods* **18**, 528-541 (2021).  
283 <https://doi.org/10.1038/s41592-021-01126-2>
- 284 110 Schindelin, J. *et al.* Fiji: an open-source platform for biological-image analysis. *Nat Methods* **9**,  
285 676-682 (2012). <https://doi.org/10.1038/nmeth.2019>
- 286 111 Karpova, N. N. & Umemori, J. in *Epigenetic Methods in Neuroscience Research* (ed Nina Karpova)  
287 97-114 (Springer New York, 2016).
- 288 112 Robinson, J. T. *et al.* Integrative genomics viewer. *Nature biotechnology* **29**, 24-26 (2011).  
289 <https://doi.org/10.1038/nbt.1754>
- 290 113 Pinzon-Arteaga, C. *et al.* Efficient correction of a deleterious point mutation in primary horse  
291 fibroblasts with CRISPR-Cas9. *Scientific Reports* **10**, 7411 (2020).  
292 <https://doi.org/10.1038/s41598-020-62723-3>
- 293 114 Wong, N., Liu, W. & Wang, X. WU-CRISPR: characteristics of functional guide RNAs for the  
294 CRISPR/Cas9 system. *Genome biology* **16**, 218 (2015). [https://doi.org/10.1186/s13059-015-](https://doi.org/10.1186/s13059-015-0784-0)  
295 [0784-0](https://doi.org/10.1186/s13059-015-0784-0)
- 296 115 Konermann, S. *et al.* Genome-scale transcriptional activation by an engineered CRISPR-Cas9  
297 complex. *Nature* **517**, 583-588 (2015). <https://doi.org/10.1038/nature14136>
- 298 116 Parra, I. & Windle, B. High resolution visual mapping of stretched DNA by fluorescent hybridization.  
299 *Nat Genet* **5**, 17-21 (1993). <https://doi.org/10.1038/ng0993-17>
- 300 117 Krueger, F. *Trim Galore: a wrapper tool around Cutadapt and FastQC to consistently apply quality*  
301 *and adapter trimming to FastQ files, with some extra functionality for MspI-digested RRBS-type*  
302 *(Reduced Representation Bisulfite-Seq) libraries,*  
303 [http://www.bioinformatics.babraham.ac.uk/projects/trim\\_galore/](http://www.bioinformatics.babraham.ac.uk/projects/trim_galore/).> (
- 304 118 Dobin, A. *et al.* STAR: ultrafast universal RNA-seq aligner. *Bioinformatics* **29**, 15-21 (2013).  
305 <https://doi.org/10.1093/bioinformatics/bts635>
- 306 119 Storer, J., Hubley, R., Rosen, J., Wheeler, T. J. & Smit, A. F. The Dfam community resource of  
307 transposable element families, sequence models, and genome annotations. *Mob DNA* **12**, 2  
308 (2021). <https://doi.org/10.1186/s13100-020-00230-y>
- 309 120 Liao, Y., Smyth, G. K. & Shi, W. featureCounts: an efficient general purpose program for assigning  
310 sequence reads to genomic features. *Bioinformatics* **30**, 923-930 (2014).  
311 <https://doi.org/10.1093/bioinformatics/btt656>

312 121 Love, M. I., Huber, W. & Anders, S. Moderated estimation of fold change and dispersion for RNA-  
313 seq data with DESeq2. *Genome biology* **15**, 550 (2014). [https://doi.org/10.1186/s13059-014-](https://doi.org/10.1186/s13059-014-0550-8)  
314 [0550-8](https://doi.org/10.1186/s13059-014-0550-8)  
315 122 Wickham, H. ggplot2: Elegant Graphics for Data Analysis}. *Springer-Verlag New York* (Springer-  
316 Verlag New York).  
317 123 Langmead, B. & Salzberg, S. L. Fast gapped-read alignment with Bowtie 2. *Nature Methods* **9**,  
318 357-359 (2012). <https://doi.org/10.1038/nmeth.1923>  
319 124 Li, H. & Durbin, R. Fast and accurate short read alignment with Burrows-Wheeler transform.  
320 *Bioinformatics* **25**, 1754-1760 (2009). <https://doi.org/10.1093/bioinformatics/btp324>  
321 125 Zhang, Y. *et al.* Model-based analysis of ChIP-Seq (MACS). *Genome biology* **9**, R137 (2008).  
322 <https://doi.org/10.1186/gb-2008-9-9-r137>  
323 126 Ramírez, F. *et al.* deepTools2: a next generation web server for deep-sequencing data analysis.  
324 *Nucleic Acids Res* **44**, W160-165 (2016). <https://doi.org/10.1093/nar/gkw257>  
325 127 pheatmap: Pretty Heatmaps v. R package version 1.0.12 (2019).  
326 128 Corces, M. R. *et al.* An improved ATAC-seq protocol reduces background and enables  
327 interrogation of frozen tissues. *Nat Methods* **14**, 959-962 (2017).  
328 <https://doi.org/10.1038/nmeth.4396>  
329
